## Association between *ApoE* polymorphism and type 2 diabetes:

### A meta-analysis of 59 studies

Dawei Chen<sup>1</sup>, Jikang Shi<sup>2</sup>, Yun Li<sup>3</sup>, Yu Yang<sup>4</sup>, Hui Yang<sup>5</sup>, Shuping Ren<sup>6\*</sup>

1. Department of Radiation Protection, School of Public Health, Jilin University, China;
2. Department of Epidemiology and Statistics, School of Public Health, Jilin University, China;
3. Department of Ophthalmology, China-Japan Union Hospital, Jilin University, China;
4. Function Experiment Center of College of Basic Medicine, Jilin University, China;
5. Teaching Center of Preventive Medicine, School of Public Health, Jilin University, China;
6. Department of Occupational and Environmental Health, School of Public Health, Jilin University, China;

\*Corresponding Author: Shuping Ren

Add: No. 1163 Xinmin Street, Department of Occupational and Environmental Health, School of Public Health, Jilin University, Changchun, 130021, Jilin Province, China;

[Tel: +86-431-85619453](tel:+86-431-85619453);

Fax: +86-431-85619438;

Email: [rensp@jlu.edu.cn](mailto:rensp@jlu.edu.cn).

## Abstract

(1) Aims: Due to the ever increasing incidence of T2DM, it is estimated that only half of the 79 million adults with type 2 diabetes (T2DM) will have adequate access to insulin by 2030 if the current levels of access is not improved. It is urgent to identify the important risk factors for T2DM and develop effective strategies to address the problem of T2DM. Our study aimed to evaluate the association between apolipoprotein E (*ApoE*) genetic polymorphism and type 2 diabetes, and to provide clues for the etiology of T2DM and even molecular marker of targeted therapy for the treatment of T2DM.

(2) Methods: Case-control studies of ApoE polymorphism and T2DM, which were included in PubMed, Web of Science, Medline, WanFang, VIP, and CNKI databases, were selected and evaluated according to criteria of inclusion and exclusion. Eligible data were extracted and pooled, and were analyzed and assessed using R soft-ware (version 3.4.3). Random-effect models were used when heterogeneity existed in between-study, and fixed-effect models were applied otherwise.

(3) Results: A total of 59 studies that consisted of 6,872 cases with T2DM and 8,250 controls were selected. Alleles and genotypes of *ApoE* between cases and controls were compared. For *ApoE* alleles, we observed the contrast of  $\epsilon 4$  versus  $\epsilon 3$  allele yielding a pooled OR of 1.18 (95% CI: 1.09-1.28;  $P < 0.001$ ). For *ApoE* genotypes, compared with  $\epsilon 3/\epsilon 3$  genotype,  $\epsilon 2/\epsilon 2$  genotype showed a possible association with T2DM (OR=1.46; 95% CI: 1.11-1.93;  $P = 0.007$ ),  $\epsilon 3/\epsilon 4$  genotype had a 1.11-fold risk of developing T2DM (OR=1.11; 95% CI: 1.01-1.22;  $P = 0.039$ ), and  $\epsilon 4/\epsilon 4$  genotype had a 1.71-fold risk of developing T2DM (OR=1.71; 95% CI: 1.33-2.19;  $P < 0.001$ ).

(4) Conclusions: There is an association between *ApoE* polymorphism and T2DM: allele  $\epsilon 4$  and genotypes ( $\epsilon 2/\epsilon 2$ ,  $\epsilon 3/\epsilon 4$ , and  $\epsilon 4/\epsilon 4$ ) are associated with the increased risk for the development of T2DM, and they may be risk factors for T2DM.

**Keywords:** apolipoprotein E; meta-analysis; polymorphism; type 2 diabetes

## 1. Introduction

It is estimated that only half of the 79 million adults with type 2 diabetes will have adequate access to insulin by 2030 if the current levels of access is not improved (BASU *et al.* 2019). Moreover, one of the significant causes of worldwide mortality and morbidity is diabetes (2016), especially type 2 diabetes mellitus, which is also the major cause of substantial global economic burden (BOMMER *et al.* 2017). Therefore, there is an urgent need to identify the important risk factors for T2DM and develop effective strategies to address the problem of T2DM.

It is well accepted that genetic factor, environmental factors, and lifestyle contribute to the development of T2DM. Complex interactions between multiple genes and a range of environmental factors are involved in the onset and progression of type 2 diabetes (SCHEUNER *et al.* 2008). A better understanding of the contribution of genetic factors in the etiology of T2DM will facilitate the development of effective preventive strategies to reduce the ever increasing incidence of T2DM (DAVIES and THIRLAWAY 2013), it will also improve the effectiveness and precision of treatment and prevention strategies (O'RAHILLY *et al.* 2005).

*ApoE* gene is one of the most studied genes which is responsible for stabilizing and solubilizing circulating lipoproteins in our body (CHAUDHARY *et al.* 2012). *ApoE* is a plasma glycoprotein of 34 kDa with 299-amino acids, and acts as a high affinity ligand for several hepatic lipoprotein receptors such as low-density lipoprotein receptor (LDLR) and LDL-related protein (LRP) (CHAUDHARY *et al.* 2012). *ApoE* is also involved in the process of cellular incorporation of several lipoproteins for transport and digestion (MAHLEY and RALL 2000) and is associated with several other plasma glycoproteins, such as high density lipoprotein (HDL), very low density lipoprotein (VLDL), and chylomicrons (SINGH *et al.* 2006b). In humans, apoE gene is located on the chromosome at position 19q13.2 with SNPs at positions 112 (rs 429358) and 158 (rs 7412), and includes three major alleles:  $\epsilon$ 2 (T to C substitution at position 158), the most common  $\epsilon$ 3, and  $\epsilon$ 4 (C to T substitution at position 112); 3 isoforms: ApoE2 (Cys112, 158Cys), ApoE3 (Cys112, 158Arg), and ApoE4 (Arg112, 158Arg); and 6

genotypes having 3 homozygous:  $\epsilon 2/\epsilon 2$ ,  $\epsilon 3/\epsilon 3$ , and  $\epsilon 4/\epsilon 4$ , and 3 heterozygous:  $\epsilon 2/\epsilon 3$ ,  $\epsilon 2/\epsilon 4$ , and  $\epsilon 3/\epsilon 4$  (SINGH *et al.* 2006b).

*ApoE* is involved in many diseases, such as coronary heart disease (CHD)(SONG *et al.* 2004), ischemic cerebrovascular disease (ICD)(MCCARRON *et al.* 1999), Alzheimer's disease (FARRER *et al.* 1997) and diabetes.

Much of the recent research has studied the association between the *ApoE* gene polymorphism and the risk of T2DM, however, there are inconsistencies between the results of the different studies. The inconsistency may result from the difference of included population, sample size, and genotyping methods. Moreover, 18 new papers(CHEN 2006; TANG *et al.* 2007; ERDOGAN *et al.* 2009; AL-MAJED *et al.* 2011; CHAUDHARY *et al.* 2012; MUSTAPIC *et al.* 2012; GE *et al.* 2013; RONG *et al.* 2013; SUN *et al.* 2013a; XIONG *et al.* 2013; ALHARBI *et al.* 2014; LIU 2014; WANG *et al.* 2014; ATTA *et al.* 2016; LIU *et al.* 2016; LUO *et al.* 2016; MEHMET *et al.* 2016; LIANG *et al.* 2017) have been published since the publication of latest meta-analysis of the association between *ApoE* gene polymorphism and T2DM in 2014(YIN *et al.* 2014). Therefore, we enrolled these new published articles, and performed a further meta-analysis to investigate whether *ApoE* polymorphism is associated with the increased risk of T2DM.

## 2. Materials and Methods

### 2.1. Search strategy

We performed this meta-analysis by extensive literature search in PubMed, Web of Science, Medline, WanFang, VIP, and CNKI databases (last search on November 19, 2018). The terms used for searching were (“*ApoE*” OR “Apolipoprotein E”) AND (“polymorphism, Genetic” OR “variant” OR “mutation”) AND (“type 2 diabetes mellitus” OR “type 2 diabetes” OR “T2DM” OR “non-insulin dependent diabetes” OR “NIDDM”). The equivalent Chinese terms were used in the Chinese databases. In addition, we retrieved related articles that had not been identified in the initial search to replenish literatures.

## **2.2. Inclusion/exclusion criteria**

Studies included in this meta-analysis were based on the following criteria: (1) case–control studies; (2) assessing the association between *ApoE* polymorphism and type 2 diabetes. The exclusion criteria met the follows: (1) duplicate articles; (2) no healthy controls; (3) lack of sufficient information on genotype or allele frequencies.

## **2.3. Data extraction**

We extracted the main characteristics of each eligible study, including first author’s last name, date of publication, region, population’s ethnicity, genotyping method, number of cases and controls, and counts of the *ApoE* genotype or allele. We collected and calculated Hardy–Weinberg equilibrium (HWE) among the controls.

## **2.4. Quality assessment**

The Newcastle-Ottawa scale (NOS) was used to evaluate quality of each article through a “star” rating system consisting of selection, comparability, and exposure. We allocated a score of 1 point for each condition a study met, and no point (0 score) if the condition or requirement was lacking. We calculated the total Quality Score of each study. Two authors (Jikang Shi and Shuping Ren) assessed the quality of included studies independently, When inconformity existed between the two authors, the results were requested to discuss with the third investigator (Dawei Chen). To avoid selection bias, studies with poor quality score were not excluded.

## **2.5. Statistical analysis**

Allele and genotype frequencies of *ApoE* were calculated for each study to evaluate the HWE using Goodness of fit Chi-square test among control groups, and  $P < 0.05$  was considered as a significant deviation from HWE. The strength of association between

*ApoE* polymorphisms and type 2 diabetes susceptibility was assessed using odds ratios (*OR*) and 95% confidence intervals (95% *CI*) because outcome variable was binary. Heterogeneity was evaluated by the Chi-square test based *Q*-statistic and quantified by *I*<sup>2</sup>-statistic (HIGGINS *et al.* 2003). Random-effect models (DerSimonian and Laird methods) were used to calculate *OR* and 95% *CI* when *P* value of *Q* test was more than 0.10 or *I*<sup>2</sup> value was more than 50%; otherwise, fixed-effect models (Mantel and Haenszel methods) were applied (*I*<sup>2</sup>≥50% considered heterogeneity existed in between-study in this meta-analysis). Subgroup analyses stratified by ethnicity, quality score and Hardy–Weinberg equilibrium were performed to identify main sources of heterogeneity and to observe the association between *ApoE* polymorphisms and type 2 diabetes in different groups. Publication bias was assessed using funnel plots, and quantified by the Begg’s and Egger’s tests (*P*<0.05 considered statistically significant publication bias) (BEGG and MAZUMDAR 1994). Sensitivity analysis was performed to examine stability of results by omitting each study in each turn. All data management and statistical analyses were used R soft-ware (version 3.4.3), *P*-value <0.05 was considered statistically significant.

### 3. Results

#### 3.1. Study Characteristics

Our meta-analysis initially collected 791 published articles, including 782 papers identified using our search strategy and 9 papers identified through the references. After abstracts and full texts were scanned according to the inclusion and exclusion criteria, 59 eligible articles with 6,872 cases and 8,250 controls were finally included in this paper. The protocol of the process for literature identification and selection is listed in Figure 1, and the baseline characteristics of the included studies are summarized in Table 1.

#### 3.2. Association between alleles of *ApoE* and type 2 diabetes

There was significant heterogeneity in the comparison of *ApoE*  $\epsilon$ 2 with  $\epsilon$ 3 allele (*I*<sup>2</sup>=62%), and the pooled *OR* was 1.16 (95% *CI*: 0.98-1.37; *P*=0.079) when *ApoE*  $\epsilon$ 2 was compared with  $\epsilon$ 3 using the random-effects model (Figure 2); however, there was

not heterogeneity in the comparison of *ApoE*  $\epsilon 4$  with  $\epsilon 3$  allele ( $I^2=36\%$ ), and the pooled *OR* was 1.18 (95% *CI*: 1.09-1.28;  $P<0.001$ ) when *ApoE*  $\epsilon 4$  was compared with  $\epsilon 3$  using the fixed-effects model (Figure 3), suggesting that *ApoE*  $\epsilon 4$  allele may be a risk factor for type 2 diabetes.

### 3.3. Association between genotypes of *ApoE* and type 2 diabetes

There were five genotypes ( $\epsilon 2/\epsilon 2$ ,  $\epsilon 2/\epsilon 3$ ,  $\epsilon 2/\epsilon 4$ ,  $\epsilon 3/\epsilon 4$ , and  $\epsilon 4/\epsilon 4$ ) were compared with  $\epsilon 3/\epsilon 3$  genotype. No significant heterogeneity was found when the  $\epsilon 2/\epsilon 2$  genotype was compared with  $\epsilon 3/\epsilon 3$  genotype ( $I^2=0\%$ ), and the yielded *OR* of  $\epsilon 2/\epsilon 2$  genotype versus  $\epsilon 3/\epsilon 3$  genotype using a fixed-effects model was 1.46 (95% *CI*: 1.11-1.93;  $P=0.007$ ) (Figure 4), suggesting that the  $\epsilon 2/\epsilon 2$  genotype may have a harmful effect on type 2 diabetes. However, when  $\epsilon 2/\epsilon 3$  genotype was compared with  $\epsilon 3/\epsilon 3$  genotype, there was significant heterogeneity ( $I^2=55\%$ ), and the yielded *OR* of  $\epsilon 2/\epsilon 3$  genotype versus  $\epsilon 3/\epsilon 3$  genotype using a random-effects model was 1.09 (95% *CI*: 0.90-1.32;  $P=0.397$ ) (Figure 5). Compared with  $\epsilon 3/\epsilon 3$  genotype, there were no significant heterogeneity between  $\epsilon 2/\epsilon 4$ ,  $\epsilon 3/\epsilon 4$ , and  $\epsilon 4/\epsilon 4$  genotype, respectively ( $I^2=0\%$ ,  $I^2=39\%$ , and  $I^2=0\%$ ). The yielded *OR* of  $\epsilon 2/\epsilon 4$  genotype versus  $\epsilon 3/\epsilon 3$  genotype using a fixed-effects model was 1.15 (95% *CI*: 0.90-1.46;  $P=0.276$ ) (Figure 6). The yielded *OR* of  $\epsilon 3/\epsilon 4$  genotype versus  $\epsilon 3/\epsilon 3$  genotype using a fixed-effects model was 1.11 (95% *CI*: 1.01-1.22;  $P=0.039$ ) (Figure 7). For the comparison of  $\epsilon 4/\epsilon 4$  genotype with  $\epsilon 3/\epsilon 3$  genotype, the yielded *OR* showed a 1.71-fold risk of type 2 diabetes ( $OR=1.71$ ; 95% *CI*: 1.33-2.19;  $P<0.001$ ) using the fixed-effects model (Figure 8).

### 3.4. Subgroup analysis

We conducted subgroup analysis stratified by ethnicity, quality score and Hardy–Weinberg equilibrium in order to identify main sources of heterogeneity. There were significant heterogeneity in the comparison of *ApoE*  $\epsilon 2$  with  $\epsilon 3$  allele ( $I^2=62\%$ ) and the comparison of  $\epsilon 2/\epsilon 3$  genotype with  $\epsilon 3/\epsilon 3$  genotype ( $I^2=55\%$ ) in our paper; however, we did not investigate sources of heterogeneity and there was no significant association between *ApoE* polymorphisms and type 2 diabetes in different subgroups (Supplementary Figure S1-S3).

### 3.5. Publication bias

Publication bias was assessed by funnel plots and quantified by Begg's and Egger's tests. All the funnel plots for *ApoE* allele and *ApoE* genotypes seemed symmetrical (Supplementary Figure S4-S5), and the results of Begg's and Egger's tests showed that there was no publication bias for the association between *ApoE* allele and type 2 diabetes and for the association between the *ApoE* genotypes and type 2 diabetes (all  $P > 0.05$ ).

### 3.6. Sensitivity analysis

Our results of sensitivity analysis showed that none of individual study influenced on the corresponding pooled *ORs* and 95% *CI*s in the comparison of *ApoE*  $\epsilon 4$  with  $\epsilon 3$  allele or in the comparison of *ApoE*  $\epsilon 2/\epsilon 3$ ,  $\epsilon 2/\epsilon 4$ , and  $\epsilon 4/\epsilon 4$  with genotype  $\epsilon 3/\epsilon 3$  genotype (Figure 10, Figure 12, Figure 13, and Figure 15), suggesting that these results were relatively stable and credible. However, there were slight effects of individual study on the corresponding pooled *ORs* and 95% *CI*s in the comparison of *ApoE*  $\epsilon 2$  with  $\epsilon 3$  allele or in the comparison of *ApoE*  $\epsilon 2/\epsilon 2$  and  $\epsilon 3/\epsilon 4$  with genotype  $\epsilon 3/\epsilon 3$  genotype (Figure 9, Figure 11, and Figure 14).



Table 1 Main characteristics of the included studies

| Study                                   | Year | Region    | Ethnicity | Genotyping method             | Sample size<br>(case/control) | Quality score | HWE<br>Y/N(P) | $\epsilon_2/\epsilon_2(n)+\epsilon_2/\epsilon_3(n)$ |         | $\epsilon_2/\epsilon_4(n)+\epsilon_3/\epsilon_3(n)$ |         | $\epsilon_3/\epsilon_4(n)+\epsilon_4/\epsilon_4(n)$ |         |
|-----------------------------------------|------|-----------|-----------|-------------------------------|-------------------------------|---------------|---------------|-----------------------------------------------------|---------|-----------------------------------------------------|---------|-----------------------------------------------------|---------|
|                                         |      |           |           |                               |                               |               |               | case                                                | control | case                                                | control | case                                                | control |
| Singh(SINGH <i>et al.</i> 2006a)        | 2006 | India     | Asian     | PCR-RELP                      | 90/97                         | 9             | Y(0.184)      | 1+4                                                 | 1+7     | 2+78                                                | 0+74    | 5+0                                                 | 13+2    |
| Al-Majed(AL-MAJED <i>et al.</i> 2011)   | 2011 | Kuwait    | Other     | PCR-RELP                      | 105/62                        | 6             | N(0.006)      | 7+2                                                 | 2+3     | 2+73                                                | 2+46    | 6+15                                                | 9+1     |
| Chaudhary(CHAUDHARY <i>et al.</i> 2012) | 2012 | Bangkok   | Other     | PCR-RELP                      | 155/149                       | 8             | Y(0.121)      | 1+2                                                 | 2+12    | 1+117                                               | 0+113   | 30+4                                                | 21+1    |
| Errera(ERRERA <i>et al.</i> 2006)       | 2006 | Brazil    | Other     | PCR-RELP                      | 95/107                        | 7             | Y(0.584)      | 0+13                                                | 0+7     | 2+68                                                | 0+77    | 12+0                                                | 23+0    |
| Alharbi(ALHARBI <i>et al.</i> 2014)     | 2014 | Riyadh    | Other     | TaqMan                        | 438/460                       | 7             | N(<0.001)     | 35+26                                               | 27+18   | 13+290                                              | 11+334  | 35+39                                               | 60+10   |
| Inamdar(INAMDAR <i>et al.</i> 2000)     | 2000 | India     | Asian     | Flat gel isoelectric focusing | 60/40                         | 8             | Y(0.054)      | 2+8                                                 | 1+9     | 3+17                                                | 2+10    | 16+14                                               | 8+10    |
| Kwon(KWON <i>et al.</i> 2007)           | 2007 | Korea     | Asian     | PCR-RELP                      | 94/88                         | 7             | Y(0.924)      | 0+13                                                | 0+5     | 3+63                                                | 0+70    | 14+1                                                | 12+1    |
| Atta(ATTA <i>et al.</i> 2016)           | 2016 | Egypt     | Other     | PCR-RELP                      | 45/45                         | 5             | Y(0.098)      | 0+12                                                | 0+3     | 12+12                                               | 3+30    | 9+0                                                 | 9+0     |
| Vauhkonen(VAUHKONEN <i>et al.</i> 1997) | 1997 | Finland   | Caucasian | PCR-RELP                      | 86/125                        | 8             | Y(0.963)      | 0+7                                                 | 0+9     | 3+48                                                | 2+76    | 20+8                                                | 33+5    |
| Erdogan(ERDOGAN <i>et al.</i> 2009)     | 2009 | Turkey    | Caucasian | PCR-RELP                      | 56/35                         | 7             | N(<0.001)     | 0+4                                                 | 0+0     | 0+40                                                | 0+28    | 12+0                                                | 7+0     |
| Eto(ETO <i>et al.</i> 1986)             | 1986 | Japan     | Asian     | Flat gel isoelectric focusing | 105/111                       | 8             | Y(0.339)      | 0+9                                                 | 1+10    | 0+73                                                | 1+80    | 21+2                                                | 16+3    |
| Guan(GUAN <i>et al.</i> 2009)           | 2009 | Hong Kong | Asian     | PCR-LDR                       | 213/111                       | 7             | Y(0.499)      | 8+32                                                | 1+32    | 7+141                                               | 1+88    | 24+1                                                | 9+1     |
| Leiva(LEIVA <i>et al.</i> 2005)         | 2005 | Chile     | Other     | PCR-RELP                      | 193/139                       | 7             | Y(0.293)      | 0+12                                                | 0+10    | 4+133                                               | 3+87    | 43+1                                                | 39+0    |
| Liu(LIU <i>et al.</i> 2003)             | 2003 | Shanghai  | Asian     | PCR-RELP                      | 80/81                         | 7             | Y(0.217)      | 0+11                                                | 0+4     | 1+56                                                | 2+64    | 12+0                                                | 11+0    |
| Mehmet(MEHMET <i>et al.</i> 2016)       | 2015 | Turkey    | Caucasian | PCR-RELP                      | 100/50                        | 8             | N(0.039)      | 0+6                                                 | 0+22    | 0+81                                                | 0+19    | 13+0                                                | 9+0     |
| Xie(XIE <i>et al.</i> 2011)             | 2011 | Hainan    | Asian     | PCR-RELP                      | 60/20                         | 7             | Y(0.936)      | 0+13                                                | 1+3     | 4+8                                                 | 2+8     | 19+16                                               | 5+1     |
| Mustapic(MUSTAPIC <i>et al.</i> 2012)   | 2012 | Croatia   | Caucasian | TaqMan                        | 196/456                       | 6             | Y(0.331)      | 0+35                                                | 1+48    | 2+127                                               | 2+328   | 30+2                                                | 76+1    |
| Santos(SANTOS <i>et al.</i> 2002)       | 2002 | Mexico    | Other     | PCR-RELP                      | 36/22                         | 8             | Y(0.423)      | 0+0                                                 | 1+2     | 0+32                                                | 1+10    | 3+1                                                 | 8+0     |
| Kamboh(KAMBOH <i>et al.</i> 1995)       | 1995 | USA       | Caucasian | IEF-immunoblotting and PCR    | 116/659                       | 6             | Y(0.992)      | 0+23                                                | 6+88    | 5+62                                                | 19+382  | 26+0                                                | 150+14  |
| Ng(NG <i>et al.</i> 2006)               | 2016 | Hong Kong | Asian     | Other                         | 386/200                       | 6             | Y(0.168)      | 4+53                                                | 1+32    | 5+282                                               | 6+142   | 39+3                                                | 19+0    |
| Eto(ETO <i>et al.</i> 1995)             | 1995 | Japan     | Asian     | Flat gel isoelectric focusing | 281/576                       | 8             | Y(0.609)      | 1+25                                                | 2+35    | 1+192                                               | 4+414   | 55+7                                                | 111+10  |

|                                                   |      |              |           |          |         |   |           |      |      |       |        |      |       |
|---------------------------------------------------|------|--------------|-----------|----------|---------|---|-----------|------|------|-------|--------|------|-------|
| Morbois Trabut(MORBOIS-TRABUT <i>et al.</i> 2006) | 2006 | France       | Caucasian | PCR-RELP | 210/481 | 7 | Y(0.773)  | 2+31 | 5+71 | 1+143 | 14+294 | 33+0 | 87+10 |
| Powell(POWELL <i>et al.</i> 2003)                 | 2003 | UK           | Caucasian | PCR-RELP | 187/102 | 7 | Y(0.094)  | 3+22 | 2+7  | 3+89  | 1+57   | 27+3 | 21+0  |
| Guangda(GUANGDA <i>et al.</i> 1999)               | 1999 | Wuhan        | Asian     | PCR-RELP | 89/72   | 7 | Y(0.122)  | 1+13 | 1+7  | 1+66  | 2+53   | 7+1  | 7+2   |
| Zhang(ZHANG <i>et al.</i> 2000)                   | 2000 | Zhejiang     | Asian     | PCR-RELP | 63/71   | 8 | N(0.009)  | 0+7  | 0+5  | 0+50  | 3+56   | 6+0  | 6+0   |
| Zhang(ZHANG <i>et al.</i> 2003)                   | 2003 | Sichuan      | Asian     | PCR-RELP | 74/191  | 8 | Y(0.878)  | 0+5  | 1+23 | 1+55  | 1+134  | 12+1 | 31+1  |
| Sun(SUN <i>et al.</i> 2013b)                      | 2013 | Beijing      | Asian     | PCR-RELP | 243/78  | 7 | Y(0.414)  | 6+36 | 2+12 | 0+180 | 1+55   | 21+0 | 6+1   |
| Hua(HUA <i>et al.</i> 2006)                       | 2006 | Jiangsu      | Asian     | PCR-RELP | 50/60   | 8 | Y(0.190)  | 2+4  | 0+7  | 4+68  | 2+75   | 20+2 | 13+3  |
| Guo(GUO <i>et al.</i> 2003)                       | 2003 | Tianjin      | Asian     | PCR-RELP | 40/52   | 7 | Y(0.739)  | 0+4  | 0+5  | 2+23  | 1+39   | 9+2  | 6+1   |
| Liang(LIANG <i>et al.</i> 2017)                   | 2017 | guangdong    | Asian     | PCR-RELP | 44/374  | 6 | Y(0.816)  | 1+3  | 5+57 | 1+31  | 6+267  | 7+1  | 38+1  |
| Shen(SHEN <i>et al.</i> 2002a)                    | 2002 | Shanghai     | Asian     | PCR-RELP | 106/110 | 7 | Y(0.577)  | 1+7  | 1+12 | 2+84  | 4+74   | 11+1 | 18+1  |
| Zheng(ZHENG <i>et al.</i> 1998)                   | 1998 | Shanghai     | Asian     | PCR-RELP | 112/60  | 8 | Y(0.801)  | 2+16 | 1+8  | 1+81  | 0+45   | 11+1 | 6+0   |
| Hua(HUA <i>et al.</i> 2004)                       | 2004 | Suzhou       | Asian     | PCR-RELP | 38/60   | 7 | Y(0.434)  | 1+7  | 0+4  | 2+24  | 1+45   | 4+0  | 8+2   |
| Liu(LIU 2014)                                     | 2014 | Kunming      | Asian     | PCR-RELP | 215/298 | 7 | N(<0.001) | 10+0 | 2+0  | 0+174 | 0+272  | 31+0 | 23+1  |
| Xiang(GUANGDA XIANG 1999)                         | 1995 | Kunming      | Asian     | PCR-RELP | 125/50  | 7 | Y(0.715)  | 2+16 | 0+4  | 0+78  | 1+38   | 26+3 | 6+1   |
| Chen(CHEN 2006)                                   | 2006 | Fujian       | Asian     | PCR-RELP | 97/105  | 7 | Y(0.906)  | 2+15 | 1+18 | 1+70  | 2+72   | 8+1  | 10+1  |
| Xiang(GUANGDA XIANG 1999)                         | 1999 | Wuhan        | Asian     | PCR-ASO  | 130/50  | 8 | Y(0.715)  | 3+14 | 0+4  | 1+85  | 1+38   | 24+3 | 6+1   |
| Shen(SHEN <i>et al.</i> 2002b)                    | 2002 | Fujian       | Asian     | PCR-RELP | 35/50   | 6 | Y(0.112)  | 3+11 | 0+6  | 2+4   | 4+31   | 14+0 | 9+0   |
| Xiong(XIONG <i>et al.</i> 2013)                   | 2013 | Hannan       | Asian     | PCR-RELP | 121/112 | 8 | Y(0.991)  | 0+15 | 1+13 | 1+72  | 2+72   | 31+2 | 22+2  |
| Zhou(ZHOU <i>et al.</i> 2005)                     | 2005 | Heilongjiang | Asian     | PCR-RELP | 67/68   | 7 | Y(0.263)  | 0+13 | 2+9  | 1+47  | 0+46   | 6+0  | 11+0  |
| Xiang(GUANGDA XIANG 2005)                         | 2005 | Wuhan        | Asian     | PCR-ASO  | 101/95  | 7 | Y(0.438)  | 1+10 | 1+10 | 1+65  | 1+65   | 20+4 | 15+3  |
| Long(JIANQIU LONG 1999)                           | 1999 | Shanghai     | Asian     | PCR-RELP | 67/135  | 7 | Y(0.124)  | 0+15 | 0+18 | 3+36  | 4+101  | 12+1 | 12+0  |
| Liang(SHU LIANG 2005)                             | 2005 | Jiangsu      | Asian     | PCR-RELP | 145/90  | 8 | Y(0.592)  | 0+17 | 0+12 | 6+102 | 2+68   | 18+2 | 8+0   |
| Gu(LIQUN GU 2004)                                 | 2004 | jiangsu      | Asian     | PCR-RELP | 63/90   | 8 | Y(0.592)  | 0+9  | 0+12 | 3+43  | 2+68   | 7+1  | 8+0   |

|                               |      |                |       |               |         |   |           |      |      |       |       |       |      |
|-------------------------------|------|----------------|-------|---------------|---------|---|-----------|------|------|-------|-------|-------|------|
| Yang(XIANGJIU YANG 1995)      | 1995 | Hubei          | Asian | PCR-RELP      | 125/50  | 7 | N(0.028)  | 2+16 | 1+3  | 0+78  | 1+38  | 26+3  | 5+2  |
| Rong(RONG <i>et al.</i> 2013) | 2013 | Guangdong      | Asian | PCR-RELP      | 18/29   | 7 | Y(0.953)  | 0+4  | 0+8  | 0+18  | 0+29  | 2+0   | 1+0  |
| Liu(LIU <i>et al.</i> 2016)   | 2016 | Yunnan         | Asian | PCR-RELP      | 300/300 | 8 | N(<0.001) | 14+0 | 2+0  | 0+243 | 0+274 | 43+0  | 23+1 |
| Tang(TANG <i>et al.</i> 2007) | 2007 | Zhenan         | Asian | PCR-RELP      | 41/60   | 6 | Y(0.80)   | 0+1  | 0+3  | 2+28  | 1+43  | 10+0  | 13+0 |
| Qiu(QIU 2008)                 | 2008 | Zhejiang       | Asian | PCR-RELP      | 129/110 | 8 | Y(0.481)  | 0+14 | 1+18 | 3+95  | 2+76  | 14+3  | 11+2 |
| Guo(JINJING GUO 2007)         | 2007 | Gansu          | Asian | ARMS-PCR      | 40/40   | 6 | Y(0.618)  | 0+1  | 1+4  | 3+29  | 1+27  | 7+1   | 7+0  |
| Xiong(YU XIONG 2008)          | 2008 | Wuhan          | Asian | MultiARMS PCR | 316/512 | 6 | Y(0.744)  | 2+18 | 3+48 | 6+230 | 9+359 | 47+13 | 87+6 |
| Ge(GE <i>et al.</i> 2013)     | 2013 | Inner Mongolia | Asian | PCR-RELP      | 200/210 | 7 | Y(0.544)  | 3+35 | 8+40 | 2+86  | 8+103 | 73+1  | 47+4 |
| Xiang(QIAN XIANG 2010)        | 2010 | Yunnan         | Asian | PCR-RELP      | 41/102  | 7 | Y(0.473)  | 0+5  | 0+13 | 1+28  | 0+70  | 7+0   | 19+0 |
| Luo(LUO <i>et al.</i> 2016)   | 2016 | Guangdong      | Asian | PCR-RELP      | 35/50   | 6 | N(0.005)  | 0+3  | 0+2  | 1+28  | 3+38  | 2+1   | 7+0  |
| Zhang(GUANGWU ZHANG 2007)     | 2007 | Zhejiang       | Asian | PCR-RELP      | 38/49   | 6 | N(0.015)  | 0+2  | 0+1  | 0+32  | 2+39  | 3+1   | 7+0  |
| Wang(WANG <i>et al.</i> 2014) | 2014 | Guangdong      | Asian | PCR-RELP      | 57/55   | 8 | N(0.027)  | 0+4  | 2+7  | 2+33  | 4+28  | 13+5  | 8+6  |
| Zhang(LI ZHANG 1999)          | 2002 | Anhui          | Asian | PCR-RELP      | 56/76   | 5 | Y(0.631)  | 0+3  | 1+7  | 1+40  | 2+55  | 11+1  | 11+1 |
| Xiong(BIN XIONG 2005)         | 2005 | Gansu          | Asian | PCR-RELP      | 32/30   | 7 | Y(0.608)  | 1+5  | 0+4  | 1+22  | 1+23  | 2+1   | 2+0  |
| Dai(QINGFU DAI 2000)          | 2000 | Fujian         | Asian | PCR-RELP      | 32/90   | 8 | Y(0.253)  | 0+5  | 0+14 | 0+23  | 1+64  | 3+1   | 9+2  |

## 4. Discussion

In this meta-analysis, we included 59 literatures with 6,872 cases and 8,250 controls to explore the association between the *ApoE* gene polymorphism and type 2 diabetes mellitus. The major findings of our study are that allele  $\epsilon 4$  and genotypes ( $\epsilon 2/\epsilon 2$ ,  $\epsilon 3/\epsilon 4$ , and  $\epsilon 4/\epsilon 4$ ) are associated with the increased risk for the development of T2DM, however, allele  $\epsilon 2$  and genotypes ( $\epsilon 2/\epsilon 3$  and  $\epsilon 2/\epsilon 4$ ) are not associated with T2DM.

The strengths of the present study are that, 1) we included all the published literatures on the association between *ApoE* gene polymorphism and T2DM regardless of regions or ethnicities; 2) we had a large sample size. There are 18 new published papers discussing the association between *ApoE* gene polymorphism and T2DM since the last meta-analysis published in 2014, all of them are included in our present meta-analysis, which will provide more convincing evidence to the association of *ApoE* gene polymorphism with T2DM; 3) the results of our sensitivity analysis demonstrate that the conclusion of the present study is very stable; 4) the results of publication bias analysis reveal that the conclusion of our study is absent of publication bias. However, our study also has several weaknesses, 1) presence of heterogeneity in our study. We did the subgroup analysis on HWE, genotyping methods and ethnicities, but we did not trace the source of heterogeneity; 2) since the present study is a case-control study, the findings of our study cannot provide the causal relationship between *ApoE* gene polymorphism and T2DM, only the association of *ApoE* gene polymorphism with T2DM.

The findings of our meta-analysis are in accordance with the previous studies (ANTHOPOULOS *et al.* 2010; QIU XU 2010; AIMEI LONG 2013; YIN *et al.* 2014), showing that both *ApoE*  $\epsilon 4$  allele and the genotypes ( $\epsilon 3/\epsilon 4$  and  $\epsilon 4/\epsilon 4$ ) were associated with increased risk of T2DM. Subjects carrying the  $\epsilon 4$  alleles had higher plasma total cholesterol levels compared to subjects carrying the  $\epsilon 3/\epsilon 3$  genotype, and HDL cholesterol was significantly lower in the  $\epsilon 3/\epsilon 4$  than in the  $\epsilon 3/\epsilon 3$  individuals (DALLONGEVILLE *et al.* 1992); individuals carrying the  $\epsilon 2/\epsilon 2$  genotype had about 31% lower mean LDL than those with the  $\epsilon 4/\epsilon 4$  genotype (BENNET *et al.* 2007). Insulin resistance is known to be strongly associated with metabolic dyslipidemia and the correlation of lipid profiles with diabetic phenotypes is significant. Therefore, *ApoE*  $\epsilon 4$  allele and the genotypes ( $\epsilon 3/\epsilon 4$  and  $\epsilon 4/\epsilon 4$ ) were associated with an increased risk of T2DM through affecting the lipid metabolism.

We found the genotype  $\epsilon 2/\epsilon 2$  was associated with increased risk of T2DM, but not allele  $\epsilon 2$  or genotype  $\epsilon 2/\epsilon 3$ ; which are not in agreement with the results of previous meta-analyses (YIN *et al.* 2014). The results from Yan *et al.*' showed that  $\epsilon 2$  and genotype  $\epsilon 2/\epsilon 3$  were associated with increased risk of T2DM, genotype  $\epsilon 2/\epsilon 2$  was not associated with increased risk of T2DM. The inconsistency may be caused by the different subjects included. Yan *et al.*' research included only Chinese Han. Furthermore, we did not reveal the difference in the association of ApoE gene polymorphism with T2DM between ethnicities through subgroup analysis. In addition, our findings are consistent with those of Anthopoulos *et al.*' study (ANTHOPOULOS *et al.* 2010) which reveals that the ORs for the other  $\epsilon 2$ -carriers genotypes ( $\epsilon 2/\epsilon 2$ ,  $\epsilon 2/\epsilon 3$ , and  $\epsilon 2/\epsilon 4$ ) compared to  $\epsilon 3/\epsilon 3$  were greater than 1.00. The slight difference between the present study and Anthopoulos *et al.*' is that the OR of  $\epsilon 2/\epsilon 2$  in our study reaches statistical significance while the OR of  $\epsilon 2/\epsilon 3$  in Anthopoulos *et al.*' reaches statistical significance. However, the estimates of the results from Anthopoulos *et al.*' study are likely to be attenuated due to the small sample size. Our findings demonstrate that individuals with the genotype carrying single allele  $\epsilon 2$  ( $\epsilon 2/\epsilon 3$  and  $\epsilon 2/\epsilon 4$ ) are not at the risk of T2DM while those carrying two  $\epsilon 2$  allele ( $\epsilon 2/\epsilon 2$ ) possess higher risk for T2DM, which also coincides with the finding that the higher frequency of the  $\epsilon 2/APOE$  allele might be primarily related to T2DM (ERRERA *et al.* 2006).

The significance of the present study is that we identified significant association between *ApoE* gene polymorphism and T2DM, which will provide clues for the etiology of T2DM and even molecular marker of targeted therapy for the treatment of T2DM. However, it is essential to further investigate the interaction between gene and gene as well as the gene and environment since T2DM is the result of interaction between genetic and environmental factors.

In conclusion, there is an association between *ApoE* polymorphism and T2DM: allele  $\epsilon 4$  and genotypes ( $\epsilon 2/\epsilon 2$ ,  $\epsilon 3/\epsilon 4$ , and  $\epsilon 4/\epsilon 4$ ) are associated with the increased risk for the development of T2DM, and they may be risk factors for T2DM.

### **Author Contributions**

Conception and design: Shuping Ren. Provision of study materials: Dawei Chen, Jikang Shi, and Yun Li. Collection and assembly of data: Dawei Chen, Jikang Shi, Yun Li, and Yu Yang. Data analysis and interpretation: Jikang Shi and Hui Yang. Manuscript writing: Dawei Chen, Shuping Ren. Revised the language/article: All authors. Final approval of manuscript: All authors.

## Conflict of interest

The authors declare no conflict of interest.

## Acknowledgements

This work was supported by the funds from Jipai Runda Environmental Inspection Technology Corporation Limited of Beijing (Grant No. 2015YX252) and Leshiguang Measurement Technology Corporation Limited (Grant No. 2018YX046).

## References

- 2016 Worldwide trends in diabetes since 1980: a pooled analysis of 751 population-based studies with 4.4 million participants. *Lancet* **387**: 1513-1530.
- AIMEI LONG, Y. Z., XIAOQING HUANG, MINGJING SHEN, HUI CHEN, 2013 Meta-Analysis: Association of Apolipoprotein E Gene Polymorphism with Type 2 Diabetes Mellitus in Chinese Population. *The Journal of Evidence-Based Medicine* **13**: 57-60.
- AL-MAJED, H. T., J. A. QASEM, A. K. AL-SHERIFI, A. A. AL-ATTAR, A. A. QASEM *et al.*, 2011 Association between apolipoprotein E-polymorphism and Ischemic heart disease patients with or without type 2 diabetes mellitus: a preliminary study in Kuwait. *Arch Iran Med* **14**: 385-388.
- ALHARBI, K. K., I. A. KHAN and R. SYED, 2014 Association of apolipoprotein E polymorphism with type 2 diabetes mellitus in a Saudi population. *DNA Cell Biol* **33**: 637-641.
- ANTHOPOULOS, P. G., S. J. HAMODRAKAS and P. G. BAGOS, 2010 Apolipoprotein E polymorphisms and type 2 diabetes: a meta-analysis of 30 studies including 5423 cases and 8197 controls. *Mol Genet Metab* **100**: 283-291.
- ATTA, M. I., K. ABO GABAL, K. EL-HADIDI, M. SWELLAM, A. GENINA *et al.*, 2016 Apolipoprotein E genotyping in Egyptian diabetic nephropathy patients. *IUBMB Life* **68**: 58-64.
- BASU, S., J. S. YUDKIN, S. KEHLENBRINK, J. I. DAVIES, S. H. WILD *et al.*, 2019 Estimation of global insulin use for type 2 diabetes, 2018-30: a microsimulation analysis. *Lancet Diabetes Endocrinol* **7**: 25-33.
- BEGG, C. B., and M. MAZUMDAR, 1994 Operating characteristics of a rank correlation test for publication bias. *Biometrics* **50**: 1088-1101.
- BENNET, A. M., E. DI ANGELANTONIO, Z. YE, F. WENSLEY, A. DAHLIN *et al.*, 2007 Association of apolipoprotein E genotypes with lipid levels and coronary risk. *JAMA* **298**: 1300-1311.
- BIN XIONG, Y. N., XIUZHEN ZHU, 2005 Relativity between apolipoprotein E, fatty acid binding 2 polymorphism and type 2 diabetes mellitus patients with nephropathy. *CLINICAL FOCUS* **20**: 367-370.
- BOMMER, C., E. HEESEMANN, V. SAGALOVA, J. MANNE-GOEHLER, R. ATUN *et al.*, 2017 The global economic burden of diabetes in adults aged 20-79 years: a cost-of-illness study. *Lancet Diabetes Endocrinol* **5**: 423-430.

- CHAUDHARY, R., A. LIKIDLILID, T. PEERAPATDIT, D. TRESUKOSOL, S. SRISUMA *et al.*, 2012 Apolipoprotein E gene polymorphism: effects on plasma lipids and risk of type 2 diabetes and coronary artery disease. *Cardiovasc Diabetol* **11**: 36.
- CHEN, X., 2006 Relationship between paraoxonase 1, paraoxonase 2 and apolipoprotein E gene polymorphisms and type 2 diabetes nephropathy pp. Fujian Medical University.
- DALLONGEVILLE, J., S. LUSSIER-CACAN and J. DAVIGNON, 1992 Modulation of plasma triglyceride levels by apoE phenotype: a meta-analysis. *J Lipid Res* **33**: 447-454.
- DAVIES, L. E., and K. THIRLAWAY, 2013 The influence of genetic explanations of type 2 diabetes on patients' attitudes to prevention, treatment and personal responsibility for health. *Public Health Genomics* **16**: 199-207.
- ERDOGAN, M., Z. EROGLU, C. BIRAY, M. KARADENIZ, S. CETINKALP *et al.*, 2009 The relationship of the apolipoprotein E gene polymorphism Turkish Type 2 diabetic patients with and without nephropathy. *J Endocrinol Invest* **32**: 219-222.
- ERRERA, F. I., M. E. SILVA, E. YEH, C. M. MARANDUBA, B. FOLCO *et al.*, 2006 Effect of polymorphisms of the MTHFR and APOE genes on susceptibility to diabetes and severity of diabetic retinopathy in Brazilian patients. *Braz J Med Biol Res* **39**: 883-888.
- ETO, M., K. HORITA, A. MORIKAWA, H. NAKATA, M. OKADA *et al.*, 1995 Increased frequency of apolipoprotein epsilon 2 allele in non-insulin dependent diabetic (NIDDM) patients with nephropathy. *Clin Genet* **48**: 288-292.
- ETO, M., K. WATANABE, Y. IWASHIMA, A. MORIKAWA, E. OSHIMA *et al.*, 1986 Apolipoprotein E polymorphism and hyperlipemia in type II diabetics. *Diabetes* **35**: 1374-1382.
- FARRER, L. A., L. A. CUPPLES, J. L. HAINES, B. HYMAN, W. A. KUKULL *et al.*, 1997 Effects of age, sex, and ethnicity on the association between apolipoprotein E genotype and Alzheimer disease. A meta-analysis. APOE and Alzheimer Disease Meta Analysis Consortium. *JAMA* **278**: 1349-1356.
- GE, B., J. CHEN, G. TIAN, Q. LI and A. DAMIRI, 2013 The relationship between apolipoprotein E polymorphism and dyslipidemia in patients with type 2 diabetes. *CHINA MEDICAL HERALD* **10**: 17-19+23.
- GUAN, J., H. L. ZHAO, L. BAUM, Y. SUI, L. HE *et al.*, 2009 Apolipoprotein E polymorphism and expression in type 2 diabetic patients with nephropathy: clinicopathological correlation. *Nephrol Dial Transplant* **24**: 1889-1895.
- GUANGDA, X., X. BANGSHUN, L. XIUJIAN and H. YANGZHONG, 1999 Apovarepsilon(4) allele increases the risk for exercise-induced silent myocardial ischemia in non-insulin-dependent diabetes mellitus. *Atherosclerosis* **147**: 293-296.
- GUANGDA XIANG, S. X., YANZHONG HE, LING LE, DONGCHU HE, 1999 The relationship of Apo E2 and renal insufficiency lipid levels in NIDDM. *Natl Med J China*: 339.
- GUANGDA XIANG, Y. H., WEN JIANG, TAIHONG HU, 2005 Apolipoprotein 4 allele is associated with the decrease of endothelium-dependent arterial dilation in female patients with type 2 diabetes mellitus. *Chin J Endocrinol Metab* **21**: 9-12.
- GUANGWU ZHANG, A. Z., ZEFENG XU, 2007 Study on the relationship between apolipoprotein E(Apo E)gene polymorphism and Chinese patients with type 2 diabetes mellitus and diabetogenous nephropathy(DN). *ZHEJIANG JOURNAL OF CLINICAL MEDICINE* **9**: 735-736.
- GUO, J., P. LI and Z. SU, 2003 Preliminary analysis on relationship between ApoE gene polymorphism and type 2 diabetes. *Journal of Tianjin Medical University*: 532-534.
- HIGGINS, J. P., S. G. THOMPSON, J. J. DEEKS and D. G. ALTMAN, 2003 Measuring inconsistency in meta-analyses. *BMJ* **327**: 557-560.

- HUA, F., W. LIU, W. HU and Y. TANG, 2006 Research on the association of ApoE gene polymorphism and type 2 diabetes mellitus with nephropathy. SUZHOU UNIVERSITY JOURNAL OF MEDICAL SCIENCE: 837-838+860.
- HUA, F., Y. SHEN, W. HUA, X. DONG and L. ZHENG, 2004 Association of carrier protein E gene polymorphism with diabetes mellitus with gallstone. Jiangsu Med J 182-184.
- INAMDAR, P. A., S. M. KELKAR, T. P. DEVASAGAYAM and M. M. BAPAT, 2000 Apolipoprotein E polymorphism in non-insulin-dependent diabetics of Mumbai, India and its effect on plasma lipids and lipoproteins. Diabetes Res Clin Pract **47**: 217-223.
- JIANQIU LONG, X. W., SHUFU YANG, JUN GAO, AIMEI GU, 1999 The Determination of Apolipoprotein E Genetic Polymorphism in Diabetics. Journal of Navy Medicine 42-44.
- JINJING GUO, J. J., XIANGHONG XU, 2007 Association of apolipoprotein E gene polymorphism, hypersensitive C-reactive protein and type 2 diabetes mellitus with coronary heart disease. Shuanxi Medical Journal: 1613-1616.
- KAMBOH, M. I., C. E. ASTON and R. F. HAMMAN, 1995 The relationship of APOE polymorphism and cholesterol levels in normoglycemic and diabetic subjects in a biethnic population from the San Luis Valley, Colorado. Atherosclerosis **112**: 145-159.
- KWON, M. K., S. Y. RHEE, S. CHON, S. OH, J. T. WOO *et al.*, 2007 Association between apolipoprotein E genetic polymorphism and the development of diabetic nephropathy in type 2 diabetic patients. Diabetes Res Clin Pract **77 Suppl 1**: S228-232.
- LEIVA, E., V. MUJICA, R. ORREGO, M. PRIETO and M. ARREDONDO, 2005 Apolipoprotein E polymorphism in type 2 diabetic patients of Talca, Chile. Diabetes Res Clin Pract **68**: 244-249.
- LI ZHANG, M. Y., 1999 Association between apolipoprotein E gene polymorphism and type II diabetic nephropathy. ACTA UNIVERSITATIS MEDICINALIS ANHUI **34**: 102.
- LIANG, A., S. HE, X. HUA, Y. LEI, H. SUI *et al.*, 2017 Correlation between ApoE gene polymorphism and chronic cardiovascular disease and blood lipid levels of patients. International Journal of laboratory medicine **38**: 1601-1602+1605.
- LIQUN GU, S. L., MIN PAN, HUI CHEN, HUAIJIN GUAN, JIANHUA ZHU, 2004 Study in the Relationships between Apolipoprotein E Gene Polymorphism and Diabetic Retinopathy. CHINESE JOURNAL OF MISDIAGNOSTICS **4**: 664-666.
- LIU, L., K. XIANG, T. ZHENG, R. ZHANG, M. LI *et al.*, 2003 Co-inheritance of specific genotypes of HSPG and ApoE gene increases risk of type 2 diabetic nephropathy. Mol Cell Biochem **254**: 353-358.
- LIU, W., 2014 FOXC2, APOE, eNOS gene polymorphism with type 2 diabetes in Yunnan Naxi correlation, pp. Kunming Medical University.
- LIU, W., L. YANG, X. NIAN, G. ZHAO, H. LI *et al.*, 2016 The correlation between ApoE gene polymorphism with type 2 diabetes in Yuannan Naxi minority Chinese Journal of Diabetes **24**: 402-406.
- LUO, E., Q. YANG and X. LI, 2016 Analysis on the association between Apolipoprotein E Gene Polymorphism and renal Complications in Chinese Type 2 Diabetic Patients. Journal of Qiqihar University of Medicine **37**: 3130-3132.
- MAHLEY, R. W., and S. C. RALL, JR., 2000 Apolipoprotein E: far more than a lipid transport protein. Annu Rev Genomics Hum Genet **1**: 507-537.
- MCCARRON, M. O., D. DELONG and M. J. ALBERTS, 1999 APOE genotype as a risk factor for ischemic cerebrovascular disease: a meta-analysis. Neurology **53**: 1308-1311.



- MEHMET, E., E. ZUHAL, K. MUSTAFA, S. SONER, T. ASLI *et al.*, 2016 The relationship of the apolipoprotein E gene polymorphism in Turkish Type 2 Diabetic Patients with and without diabetic foot ulcers. *Diabetes Metab Syndr* **10**: S30-33.
- MORBOIS-TRABUT, L., C. CHABROLLE, M. A. GARRIGUE, G. LASFARGUES and P. LECOMTE, 2006 Apolipoprotein E genotype and plasma lipid levels in Caucasian diabetic patients. *Diabetes Metab* **32**: 270-275.
- MUSTAPIC, M., M. POPOVIC HADZIJA, M. PAVLOVIC, P. PAVKOVIC, P. PRESECKI *et al.*, 2012 Alzheimer's disease and type 2 diabetes: the association study of polymorphisms in tumor necrosis factor-alpha and apolipoprotein E genes. *Metab Brain Dis* **27**: 507-512.
- NG, M. C., L. BAUM, W. Y. SO, V. K. LAM, Y. WANG *et al.*, 2006 Association of lipoprotein lipase S447X, apolipoprotein E exon 4, and apoC3 -455T>C polymorphisms on the susceptibility to diabetic nephropathy. *Clin Genet* **70**: 20-28.
- O'RAHILLY, S., I. BARROSO and N. J. WAREHAM, 2005 Genetic factors in type 2 diabetes: the end of the beginning? *Science* **307**: 370-373.
- POWELL, D. S., H. MAKSOUD, S. B. CHARGE, J. H. MOFFITT, M. DESAI *et al.*, 2003 Apolipoprotein E genotype, islet amyloid deposition and severity of Type 2 diabetes. *Diabetes Res Clin Pract* **60**: 105-110.
- QIAN XIANG, Y. W., DIANPING SONG, HUA LIU, YUMING WANG, BO CHEN, ROU SHI, 2010 The study of the association of apolipoprotein E(ApoE) gene polymorphism with diabetic nephropathy in type 2 diabetic patients. *CHINESE JOURNAL OF DIABETES* **18**: 185-186.
- QINGFU DAI, Y. W., 2000 A STUDIES ON THE RELATIONSHIP BETWEEN APO E SEVELS AND GENOTYPES IN DIABETIE-NEPHROPATHY. *Modern Journal of Integrated Chinese and Western Medicine*: 2321-2322.
- QIU XU, S. L., GANGYI YANG, LING LI, JIANHONG LU, 2010 Association of ApoE gene polymorphisms and type 2 diabetes mellitus in Chinese population: a Meta-analysisstudy. *CTA ACADEMIAE MEDICINAE MILITARIS TERTIAE* **32**: 164-168.
- QIU, Y., 2008 Relationship between variation of apolipoprotein E gene and type 2 diabetes mellitus with carotid atherosclerosis. *Zhejiang Practical Medicine* 157-159+168.
- RONG, Y., Y. XIE, X. CHEN and B. ZHOU, 2013 Analysis fo the correlation among insulin resistance ApoE gene polymorphism and mild cognitive impairment. *Hebei Medicine* **19**: 1604-1607.
- SANTOS, A., M. L. SALGUERO, C. GURROLA, F. MUNOZ, E. ROIG-MELO *et al.*, 2002 The epsilon4 allele of apolipoprotein E gene is a potential risk factor for the severity of macular edema in type 2 diabetic Mexican patients. *Ophthalmic Genet* **23**: 13-19.
- SCHEUNER, M. T., P. SIEVERDING and P. G. SHEKELLE, 2008 Delivery of genomic medicine for common chronic adult diseases: a systematic review. *JAMA* **299**: 1320-1334.
- SHEN, H., L. LIU, K. XIANG, C. LONG, Q. WENG *et al.*, 2002a Relationship between ApoE gene polymorphism and type 2 diabetes mellitus with its nephropathy in Chinese. *Chinese Journal of Diabetes*: 2-4.
- SHEN, Q., X. CHEN, P. LI, M. LIN, M. LIN *et al.*, 2002b Relationship between polymorphism of APOE gene and plasma catenin and protein C in elderly type 2 diabetes mellitus. *F J Medical Journal*: 75-77.
- SHU LIANG, M. P., HUI CHENG, HUAIJIN GUAN, CHUNJI BIAN, 2005 Relationship of angiotensin converting enzyme and apolipoprotein E gene polymorphism with diabetic retinopathy. *International Journal of Ophthamology* **5**: 1156-1159.
- SINGH, P. P., I. NAZ, A. GILMOUR, M. SINGH and S. MASTANA, 2006a Association of APOE (Hha1) and ACE (I/D) gene polymorphisms with type 2 diabetes mellitus in North West India. *Diabetes Res Clin Pract* **74**: 95-102.

- SINGH, P. P., M. SINGH and S. S. MASTANA, 2006b APOE distribution in world populations with new data from India and the UK. *Ann Hum Biol* **33**: 279-308.
- SONG, Y., M. J. STAMPFER and S. LIU, 2004 Meta-analysis: apolipoprotein E genotypes and risk for coronary heart disease. *Ann Intern Med* **141**: 137-147.
- SUN, L., S. WANG, X. SHI and Z. YANG, 2013a Interactions between APOE and MTHFR Mutations Associated with the Risk for Type 2 Diabetic Nephropathy. *Journal of Medical Molecular Biology* **10**: 95-99.
- SUN, L., S. WANG, X. SHI and Z. YANG, 2013b Interactions between APOE and MTHFR Mutations Associated with the Risk for Type 2 Diabetic Nephropathy. *J Med Mol Biol* **10**: 95-99.
- TANG, L., X. WANG, K. YU, H. ZHANG, J. ZHENG *et al.*, 2007 Correlative analysis of apolipoprotein B, E gene polymorphism and several common diseases in southern area of Zhejiang Province *Journal of Wenzhou Medical College*: 14-17.
- VAUHKONEN, I., L. NISKANEN, M. RYYNANEN, R. VOUTILAINEN, J. PARTANEN *et al.*, 1997 Divergent association of apolipoprotein E polymorphism with vascular disease in patients with NIDDM and control subjects. *Diabet Med* **14**: 748-756.
- WANG, Y., Z. XIAO and P. HUANG, 2014 Studies on relationship between apolipoprotein E genotype polymorphism and diabetic nephropathy in Chinese Han population of Guangdong Province. *Journal of practical Medicine* **30**: 3090-3092.
- XIANGJIU YANG, G. X., XIAOHUA DING, YOUYUN FAN, YANCHENG XU, YING ZHANG, 1995 Relationship between coronary heart disease and apolipoprotein E genotype in patients with type 2 diabetes mellitus in Wuhan. *Chinese Journal of Endocrine and Metabolism*: 206-210+250.
- XIE, Y. Q., H. WANG, Y. P. WU, D. H. YIN, Z. S. WANG *et al.*, 2011 Association of APOE polymorphisms and insulin resistance with TCM syndromes in type 2 diabetes patients with macroangiopathy. *Mol Med Rep* **4**: 1219-1223.
- XIONG, Y., H. PEI, S. QIAN, K. CUI, Q. CAI *et al.*, 2013 Study on the correlation between dyslipidemia and apolipoprotein E gene polymorphism in Li nationality population T2DM patients. *Chinese Journal of Diabetes* **21**: 822-824.
- YIN, Y. W., L. QIAO, Q. Q. SUN, A. M. HU, H. L. LIU *et al.*, 2014 Influence of apolipoprotein E gene polymorphism on development of type 2 diabetes mellitus in Chinese Han population: a meta-analysis of 29 studies. *Metabolism* **63**: 532-541.
- YU XIONG, X. Z., SONGMEI LIU, YAN YANG, XIYING QU, YAN XIE, HANNING HU, ZHIYU PANG, 2008 The Association of Apolipoprotein E Genotype with Type 2 Diabetes Mellitus. *CHINESE JOURNAL OF MICROCIRCULATION* **18**: 28-29,33,封 23.
- ZHANG, W., G. ZHANG, H. ZHANG, Y. FANG, Z. XU *et al.*, 2000 Relationship between Apo E gene polymorphism and type 2 diabetes mellitus with its cardiovascular complication in Chinese. *Medical Journal of Chinese Civil Administration*: 206-209.
- ZHANG, X., B. LIU, H. BAI, H. TIAN, Z. WU *et al.*, 2003 Study on Apolipoprotein E Gene Polymorphism in Chinese Type 2 Diabetes Mellitus. *J Sichuan Univ ( Med Sci Edi)*: 75-77.
- ZHENG, Y., R. SUN, X. LI, M. GAO, L. ZHAO *et al.*, 1998 Relationship between ApoE gene polymorphism and type 2 diabetes mellitus with its cardiovascular complications in Chinese. *Chin J Endocrinol Metab*: 14-17.
- ZHOU, J., Y. XUE, Y. GUAN, Y. YANG, S. FU *et al.*, 2005 Association Study of Apolipoprotein E Gene Polymorphism and

Cerebral Infarction in Type 2 Diabetic Patients. HEREDITAS **27**: 35-38.

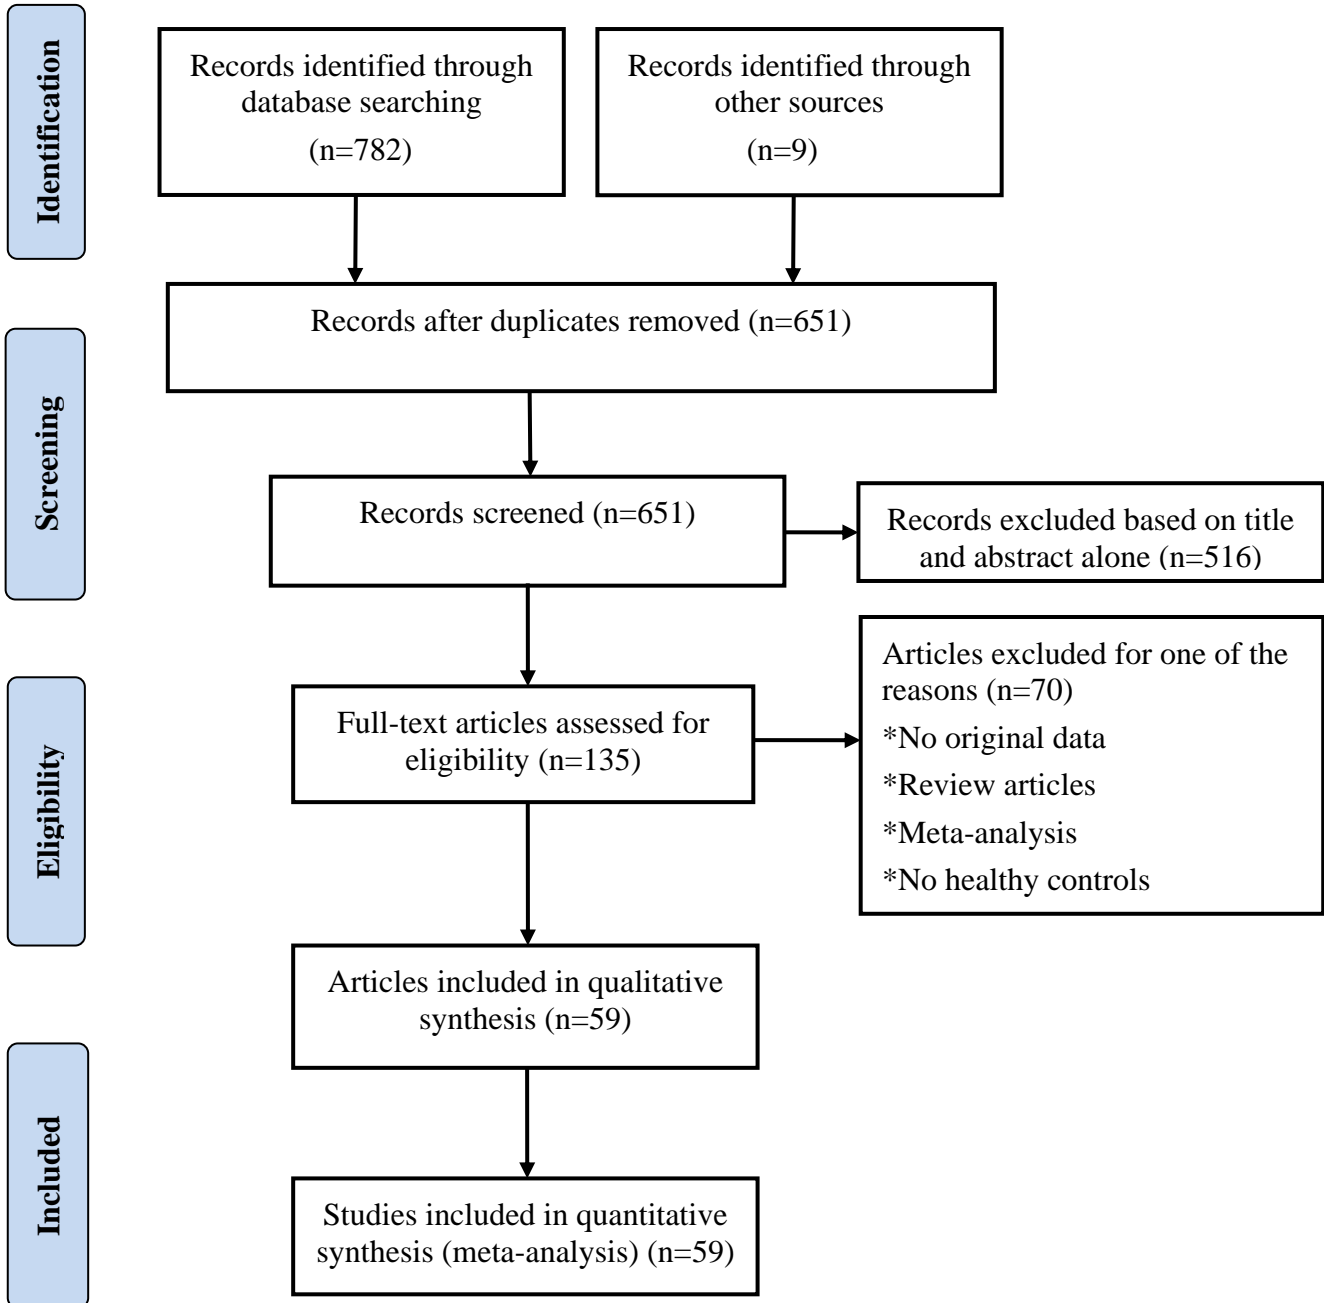

| Study               | Experimental |       | Control |       | Odds Ratio | OR   | 95%-CI         | Weight |
|---------------------|--------------|-------|---------|-------|------------|------|----------------|--------|
|                     | Events       | Total | Events  | Total |            |      |                |        |
| Singh 2006          | 8            | 173   | 9       | 177   |            | 0.91 | [0.34; 2.40]   | 1.5%   |
| Al-Majed 2011       | 18           | 172   | 8       | 112   |            | 1.52 | [0.64; 3.62]   | 1.7%   |
| Chaudhary 2012      | 5            | 271   | 16      | 275   |            | 0.30 | [0.11; 0.84]   | 1.5%   |
| Errera 2006         | 14           | 174   | 7       | 191   |            | 2.30 | [0.91; 5.84]   | 1.6%   |
| Alharbi 2014        | 109          | 750   | 83      | 829   |            | 1.53 | [1.13; 2.07]   | 2.9%   |
| Inamdar 2000        | 15           | 73    | 13      | 50    |            | 0.74 | [0.31; 1.72]   | 1.7%   |
| Kwon 2007           | 16           | 169   | 5       | 162   |            | 3.28 | [1.17; 9.18]   | 1.4%   |
| Atta 2016           | 24           | 69    | 6       | 78    |            | 6.40 | [2.43; 16.87]  | 1.5%   |
| Vauhkonen 1997      | 10           | 133   | 11      | 205   |            | 1.43 | [0.59; 3.48]   | 1.7%   |
| Erdogan 2009        | 4            | 100   | 0       | 63    |            | 5.92 | [0.31; 111.90] | 0.3%   |
| Eto 1986            | 9            | 185   | 13      | 199   |            | 0.73 | [0.31; 1.75]   | 1.7%   |
| Guan 2009           | 55           | 393   | 14      | 210   |            | 2.28 | [1.23; 4.20]   | 2.2%   |
| Leiva 2005          | 16           | 337   | 13      | 236   |            | 0.86 | [0.40; 1.81]   | 1.9%   |
| Liu 2003            | 11           | 146   | 4       | 147   |            | 2.91 | [0.91; 9.37]   | 1.2%   |
| Mehmet 2015         | 6            | 187   | 22      | 91    |            | 0.10 | [0.04; 0.27]   | 1.6%   |
| Xie 2011            | 17           | 65    | 7       | 31    |            | 1.21 | [0.44; 3.33]   | 1.5%   |
| Mustapic 2012       | 37           | 356   | 52      | 832   |            | 1.74 | [1.12; 2.70]   | 2.6%   |
| Santos 2002         | 0            | 67    | 5       | 35    |            | 0.04 | [0.00; 0.77]   | 0.3%   |
| Kamboh 1995         | 28           | 201   | 119     | 1121  |            | 1.36 | [0.88; 2.12]   | 2.6%   |
| Ng 2006             | 66           | 722   | 40      | 375   |            | 0.84 | [0.56; 1.28]   | 2.7%   |
| Eto 1995            | 28           | 492   | 43      | 1017  |            | 1.37 | [0.84; 2.23]   | 2.5%   |
| Morbois Trabut 2006 | 36           | 386   | 95      | 841   |            | 0.81 | [0.54; 1.21]   | 2.7%   |
| Powell 2003         | 31           | 258   | 12      | 154   |            | 1.62 | [0.80; 3.25]   | 2.0%   |
| Guangda 1999        | 16           | 168   | 11      | 131   |            | 1.15 | [0.51; 2.57]   | 1.8%   |
| Zhang 2000          | 7            | 120   | 8       | 131   |            | 0.95 | [0.33; 2.71]   | 1.4%   |
| Zhang 2003          | 6            | 133   | 26      | 348   |            | 0.59 | [0.24; 1.46]   | 1.6%   |
| Sun 2013            | 48           | 465   | 17      | 145   |            | 0.87 | [0.48; 1.56]   | 2.3%   |
| Hua 2006            | 12           | 172   | 9       | 179   |            | 1.42 | [0.58; 3.45]   | 1.7%   |
| Guo 2003            | 6            | 65    | 6       | 95    |            | 1.51 | [0.46; 4.90]   | 1.2%   |
| Liang 2017          | 6            | 78    | 73      | 702   |            | 0.72 | [0.30; 1.71]   | 1.7%   |
| Shen 2002           | 11           | 197   | 18      | 196   |            | 0.58 | [0.27; 1.27]   | 1.9%   |
| Zheng 1998          | 21           | 210   | 10      | 114   |            | 1.16 | [0.52; 2.55]   | 1.9%   |
| Hua 2004            | 11           | 70    | 5       | 107   |            | 3.80 | [1.26; 11.48]  | 1.3%   |
| Liu 2014            | 20           | 399   | 4       | 571   |            | 7.48 | [2.54; 22.06]  | 1.4%   |
| Xiang 1995          | 20           | 218   | 5       | 91    |            | 1.74 | [0.63; 4.78]   | 1.5%   |
| Chen 2006           | 20           | 183   | 22      | 194   |            | 0.96 | [0.50; 1.82]   | 2.2%   |
| Xiang 1999          | 21           | 229   | 5       | 91    |            | 1.74 | [0.63; 4.75]   | 1.5%   |
| Shen 2002           | 19           | 52    | 10      | 87    |            | 4.43 | [1.86; 10.56]  | 1.7%   |
| Xiong 2013          | 16           | 206   | 17      | 196   |            | 0.89 | [0.43; 1.81]   | 2.0%   |
| Zhou 2005           | 14           | 127   | 13      | 125   |            | 1.07 | [0.48; 2.37]   | 1.8%   |
| Xiang 2005          | 13           | 173   | 13      | 168   |            | 0.97 | [0.44; 2.16]   | 1.8%   |
| Long 1999           | 18           | 117   | 22      | 254   |            | 1.92 | [0.99; 3.73]   | 2.1%   |
| Liang 2005          | 23           | 262   | 14      | 170   |            | 1.07 | [0.54; 2.15]   | 2.1%   |
| Gu 2004             | 12           | 114   | 14      | 170   |            | 1.31 | [0.58; 2.95]   | 1.8%   |
| Yang 1995           | 20           | 218   | 6       | 90    |            | 1.41 | [0.55; 3.65]   | 1.6%   |
| Rong 2013           | 4            | 46    | 8       | 75    |            | 0.80 | [0.23; 2.81]   | 1.1%   |
| Liu 2016            | 28           | 557   | 4       | 575   |            | 7.56 | [2.63; 21.68]  | 1.4%   |
| Tang 2007           | 3            | 70    | 4       | 106   |            | 1.14 | [0.25; 5.26]   | 0.9%   |
| Qiu 2008            | 17           | 235   | 22      | 203   |            | 0.64 | [0.33; 1.24]   | 2.1%   |
| Guo 2007            | 4            | 70    | 7       | 72    |            | 0.56 | [0.16; 2.01]   | 1.1%   |
| Xiong 2008          | 28           | 553   | 63      | 916   |            | 0.72 | [0.46; 1.14]   | 2.6%   |
| Ge 2013             | 43           | 323   | 64      | 357   |            | 0.70 | [0.46; 1.07]   | 2.6%   |
| Xiang 2010          | 6            | 74    | 13      | 185   |            | 1.17 | [0.43; 3.20]   | 1.5%   |
| Luo 2016            | 4            | 65    | 5       | 90    |            | 1.11 | [0.29; 4.32]   | 1.0%   |
| Zhang 2007          | 2            | 71    | 3       | 89    |            | 0.83 | [0.14; 5.11]   | 0.7%   |
| Wang 2014           | 6            | 89    | 15      | 86    |            | 0.34 | [0.13; 0.93]   | 1.5%   |
| Zhang 2002          | 4            | 98    | 11      | 139   |            | 0.50 | [0.15; 1.60]   | 1.2%   |
| Xiong 2005          | 8            | 59    | 5       | 57    |            | 1.63 | [0.50; 5.32]   | 1.2%   |
| Dai 2000            | 5            | 59    | 15      | 166   |            | 0.93 | [0.32; 2.69]   | 1.4%   |

Random effects model      12224      14902  
Heterogeneity:  $I^2 = 62\%$ ,  $\tau^2 = 0.2306$ ,  $p < 0.01$

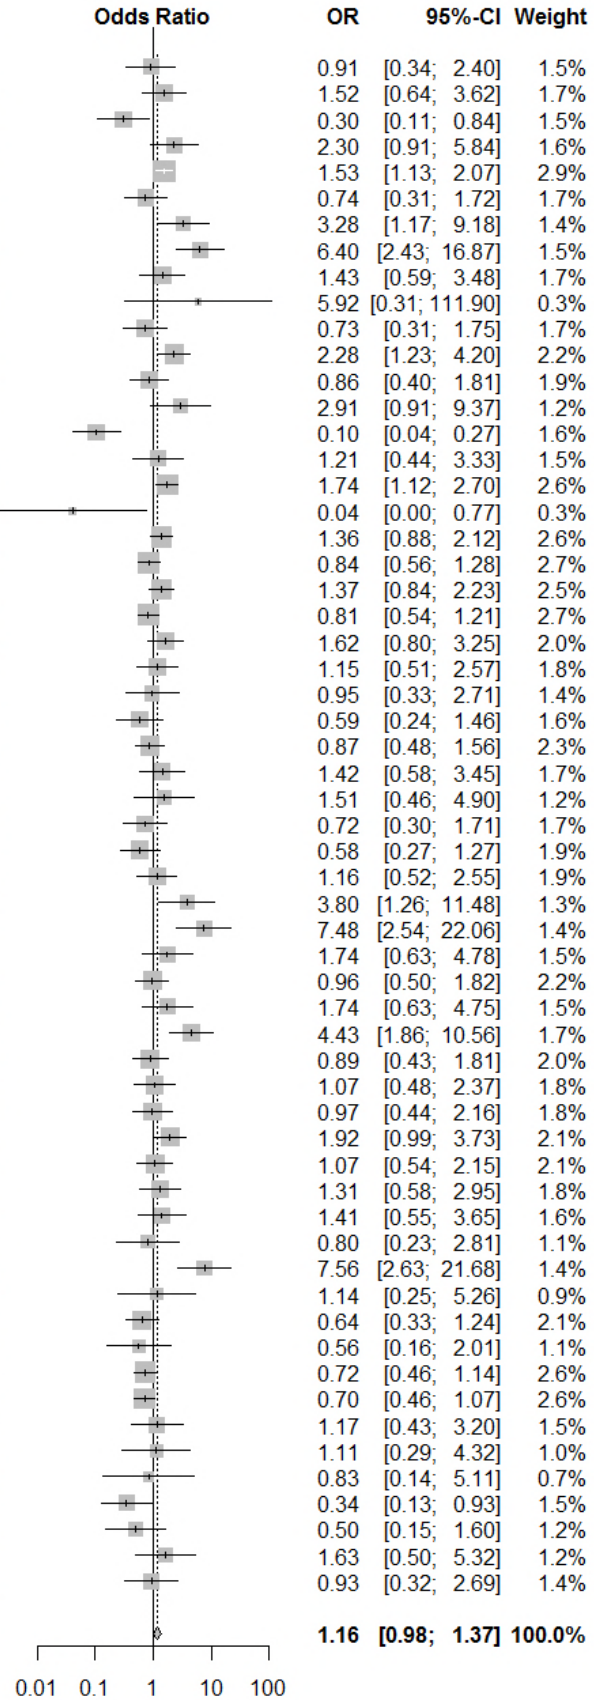

| Study               | Experimental |       | Control |       | Odds Ratio | OR                 | 95%-CI | Weight |
|---------------------|--------------|-------|---------|-------|------------|--------------------|--------|--------|
|                     | Events       | Total | Events  | Total |            |                    |        |        |
| Singh 2006          | 7            | 172   | 17      | 185   |            | 0.42 [0.17; 1.04]  | 1.4%   |        |
| Al-Majed 2011       | 38           | 192   | 12      | 116   |            | 2.14 [1.07; 4.29]  | 1.1%   |        |
| Chaudhary 2012      | 39           | 305   | 23      | 282   |            | 1.65 [0.96; 2.84]  | 1.8%   |        |
| Errera 2006         | 14           | 174   | 23      | 207   |            | 0.70 [0.35; 1.41]  | 1.7%   |        |
| Alharbi 2014        | 126          | 767   | 91      | 837   |            | 1.61 [1.21; 2.15]  | 6.4%   |        |
| Inamdar 2000        | 47           | 105   | 30      | 67    |            | 1.00 [0.54; 1.85]  | 1.8%   |        |
| Kwon 2007           | 19           | 172   | 14      | 171   |            | 1.39 [0.67; 2.88]  | 1.1%   |        |
| Atta 2016           | 21           | 66    | 12      | 84    |            | 2.80 [1.26; 6.24]  | 0.6%   |        |
| Vauhkonen 1997      | 39           | 162   | 45      | 239   |            | 1.37 [0.84; 2.22]  | 2.4%   |        |
| Erdogan 2009        | 12           | 108   | 7       | 70    |            | 1.12 [0.42; 3.01]  | 0.7%   |        |
| Eto 1986            | 25           | 201   | 23      | 209   |            | 1.15 [0.63; 2.10]  | 1.7%   |        |
| Guan 2009           | 33           | 371   | 12      | 208   |            | 1.59 [0.80; 3.16]  | 1.2%   |        |
| Leiva 2005          | 48           | 369   | 42      | 265   |            | 0.79 [0.51; 1.24]  | 3.7%   |        |
| Liu 2003            | 12           | 147   | 11      | 154   |            | 1.16 [0.49; 2.71]  | 0.9%   |        |
| Mehmet 2015         | 13           | 194   | 9       | 78    |            | 0.55 [0.23; 1.35]  | 1.1%   |        |
| Xie 2011            | 55           | 103   | 9       | 33    |            | 3.06 [1.30; 7.21]  | 0.6%   |        |
| Mustapic 2012       | 36           | 355   | 80      | 860   |            | 1.10 [0.73; 1.67]  | 3.7%   |        |
| Santos 2002         | 5            | 72    | 9       | 39    |            | 0.25 [0.08; 0.81]  | 1.0%   |        |
| Kamboh 1995         | 31           | 204   | 197     | 1199  |            | 0.91 [0.60; 1.38]  | 4.3%   |        |
| Ng 2006             | 50           | 706   | 25      | 360   |            | 1.02 [0.62; 1.68]  | 2.7%   |        |
| Eto 1995            | 70           | 534   | 135     | 1109  |            | 1.09 [0.80; 1.48]  | 6.7%   |        |
| Morbois Trabut 2006 | 34           | 384   | 121     | 867   |            | 0.60 [0.40; 0.89]  | 5.9%   |        |
| Powell 2003         | 36           | 263   | 22      | 164   |            | 1.02 [0.58; 1.81]  | 2.1%   |        |
| Guangda 1999        | 10           | 162   | 13      | 133   |            | 0.61 [0.26; 1.43]  | 1.2%   |        |
| Zhang 2000          | 6            | 119   | 9       | 132   |            | 0.73 [0.25; 2.10]  | 0.7%   |        |
| Zhang 2003          | 15           | 142   | 34      | 356   |            | 1.12 [0.59; 2.12]  | 1.5%   |        |
| Sun 2013            | 21           | 438   | 9       | 137   |            | 0.72 [0.32; 1.60]  | 1.1%   |        |
| Hua 2006            | 28           | 188   | 21      | 191   |            | 1.42 [0.77; 2.60]  | 1.6%   |        |
| Guo 2003            | 15           | 74    | 9       | 98    |            | 2.51 [1.03; 6.12]  | 0.5%   |        |
| Liang 2017          | 10           | 82    | 46      | 675   |            | 1.90 [0.92; 3.93]  | 0.8%   |        |
| Shen 2002           | 15           | 201   | 24      | 202   |            | 0.60 [0.30; 1.18]  | 1.9%   |        |
| Zheng 1998          | 14           | 203   | 6       | 110   |            | 1.28 [0.48; 3.44]  | 0.6%   |        |
| Hua 2004            | 6            | 65    | 13      | 115   |            | 0.80 [0.29; 2.21]  | 0.7%   |        |
| Liu 2014            | 31           | 410   | 25      | 592   |            | 1.86 [1.08; 3.19]  | 1.7%   |        |
| Xiang 1995          | 32           | 230   | 9       | 95    |            | 1.54 [0.71; 3.37]  | 1.0%   |        |
| Chen 2006           | 11           | 174   | 14      | 186   |            | 0.83 [0.37; 1.88]  | 1.1%   |        |
| Xiang 1999          | 31           | 239   | 9       | 95    |            | 1.42 [0.65; 3.12]  | 1.0%   |        |
| Shen 2002           | 16           | 49    | 13      | 90    |            | 2.87 [1.24; 6.64]  | 0.5%   |        |
| Xiong 2013          | 36           | 226   | 28      | 207   |            | 1.21 [0.71; 2.07]  | 2.2%   |        |
| Zhou 2005           | 7            | 120   | 11      | 123   |            | 0.63 [0.24; 1.69]  | 0.9%   |        |
| Xiang 2005          | 29           | 189   | 22      | 177   |            | 1.28 [0.70; 2.32]  | 1.7%   |        |
| Long 1999           | 17           | 116   | 16      | 248   |            | 2.49 [1.21; 5.13]  | 0.8%   |        |
| Liang 2005          | 28           | 267   | 10      | 166   |            | 1.83 [0.86; 3.87]  | 1.0%   |        |
| Gu 2004             | 12           | 114   | 10      | 166   |            | 1.84 [0.76; 4.40]  | 0.6%   |        |
| Yang 1995           | 32           | 230   | 10      | 94    |            | 1.36 [0.64; 2.89]  | 1.1%   |        |
| Rong 2013           | 2            | 44    | 1       | 68    |            | 3.19 [0.28; 36.29] | 0.1%   |        |
| Liu 2016            | 43           | 572   | 25      | 596   |            | 1.86 [1.12; 3.08]  | 2.0%   |        |
| Tang 2007           | 12           | 79    | 14      | 116   |            | 1.30 [0.57; 2.99]  | 0.8%   |        |
| Qiu 2008            | 23           | 241   | 17      | 198   |            | 1.12 [0.58; 2.17]  | 1.5%   |        |
| Guo 2007            | 12           | 78    | 8       | 73    |            | 1.48 [0.57; 3.85]  | 0.6%   |        |
| Xiong 2008          | 79           | 604   | 108     | 961   |            | 1.19 [0.87; 1.62]  | 6.4%   |        |
| Ge 2013             | 77           | 357   | 63      | 356   |            | 1.28 [0.88; 1.85]  | 4.3%   |        |
| Xiang 2010          | 8            | 76    | 19      | 191   |            | 1.07 [0.45; 2.55]  | 0.8%   |        |
| Luo 2016            | 5            | 66    | 10      | 95    |            | 0.70 [0.23; 2.14]  | 0.7%   |        |
| Zhang 2007          | 5            | 74    | 9       | 95    |            | 0.69 [0.22; 2.16]  | 0.6%   |        |
| Wang 2014           | 25           | 108   | 24      | 95    |            | 0.89 [0.47; 1.70]  | 1.7%   |        |
| Zhang 2002          | 14           | 108   | 15      | 143   |            | 1.27 [0.59; 2.76]  | 1.0%   |        |
| Xiong 2005          | 5            | 56    | 3       | 55    |            | 1.70 [0.39; 7.48]  | 0.2%   |        |
| Dai 2000            | 5            | 59    | 14      | 165   |            | 1.00 [0.34; 2.90]  | 0.6%   |        |

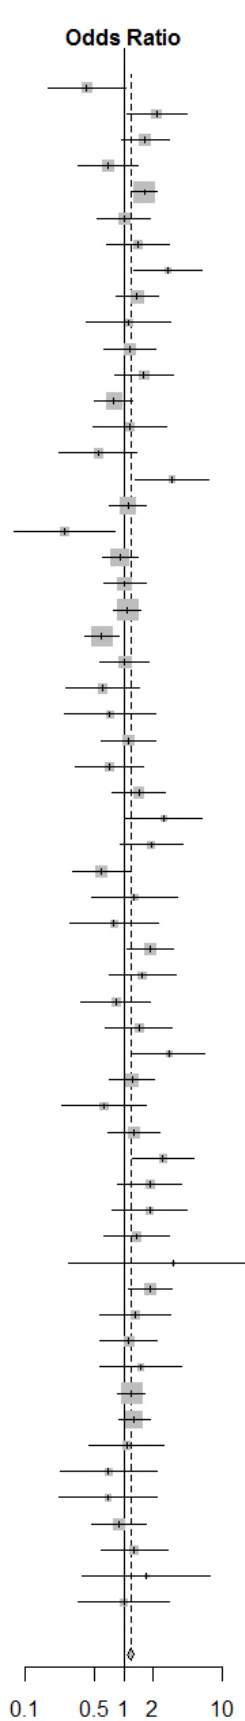

**Fixed effect model**      **12686**      **15398**  
Heterogeneity:  $I^2 = 36\%$ ,  $\tau^2 = 0.0549$ ,  $p < 0.01$

**1.18 [1.09; 1.28] 100.0%**

0.1    0.5    1    2    10

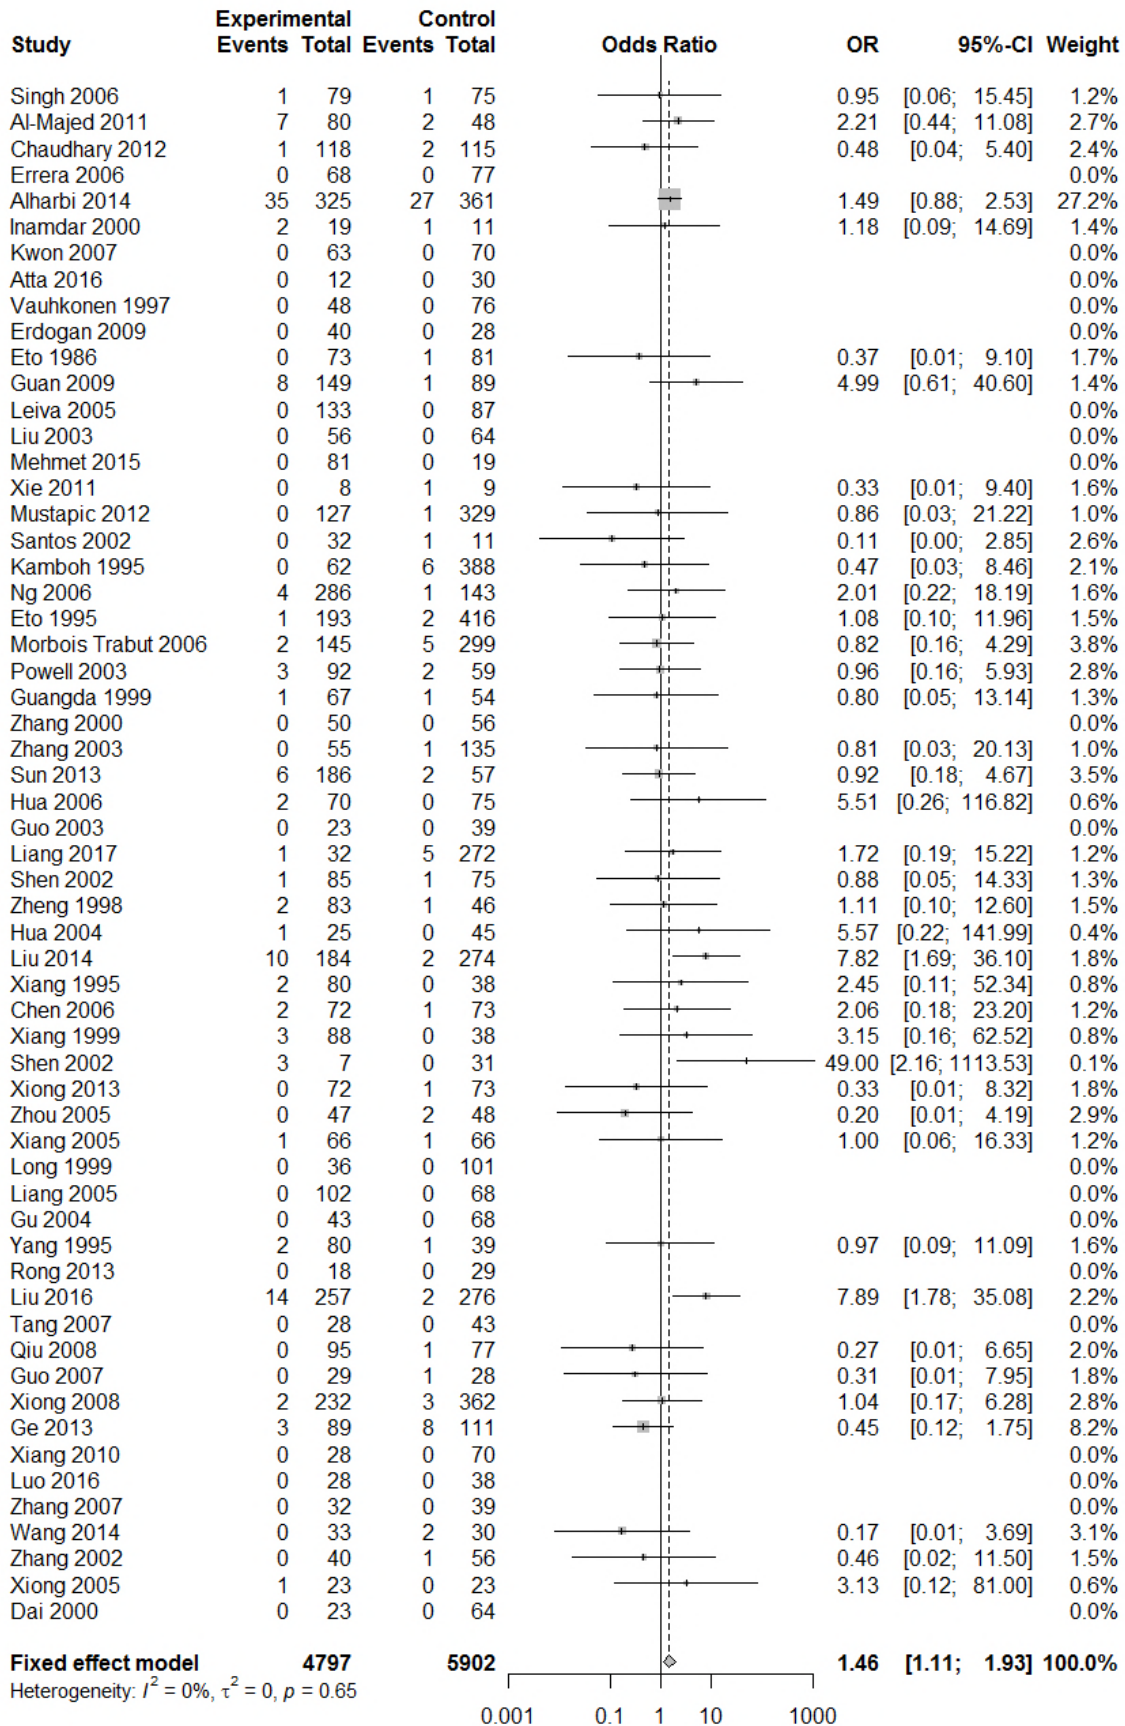

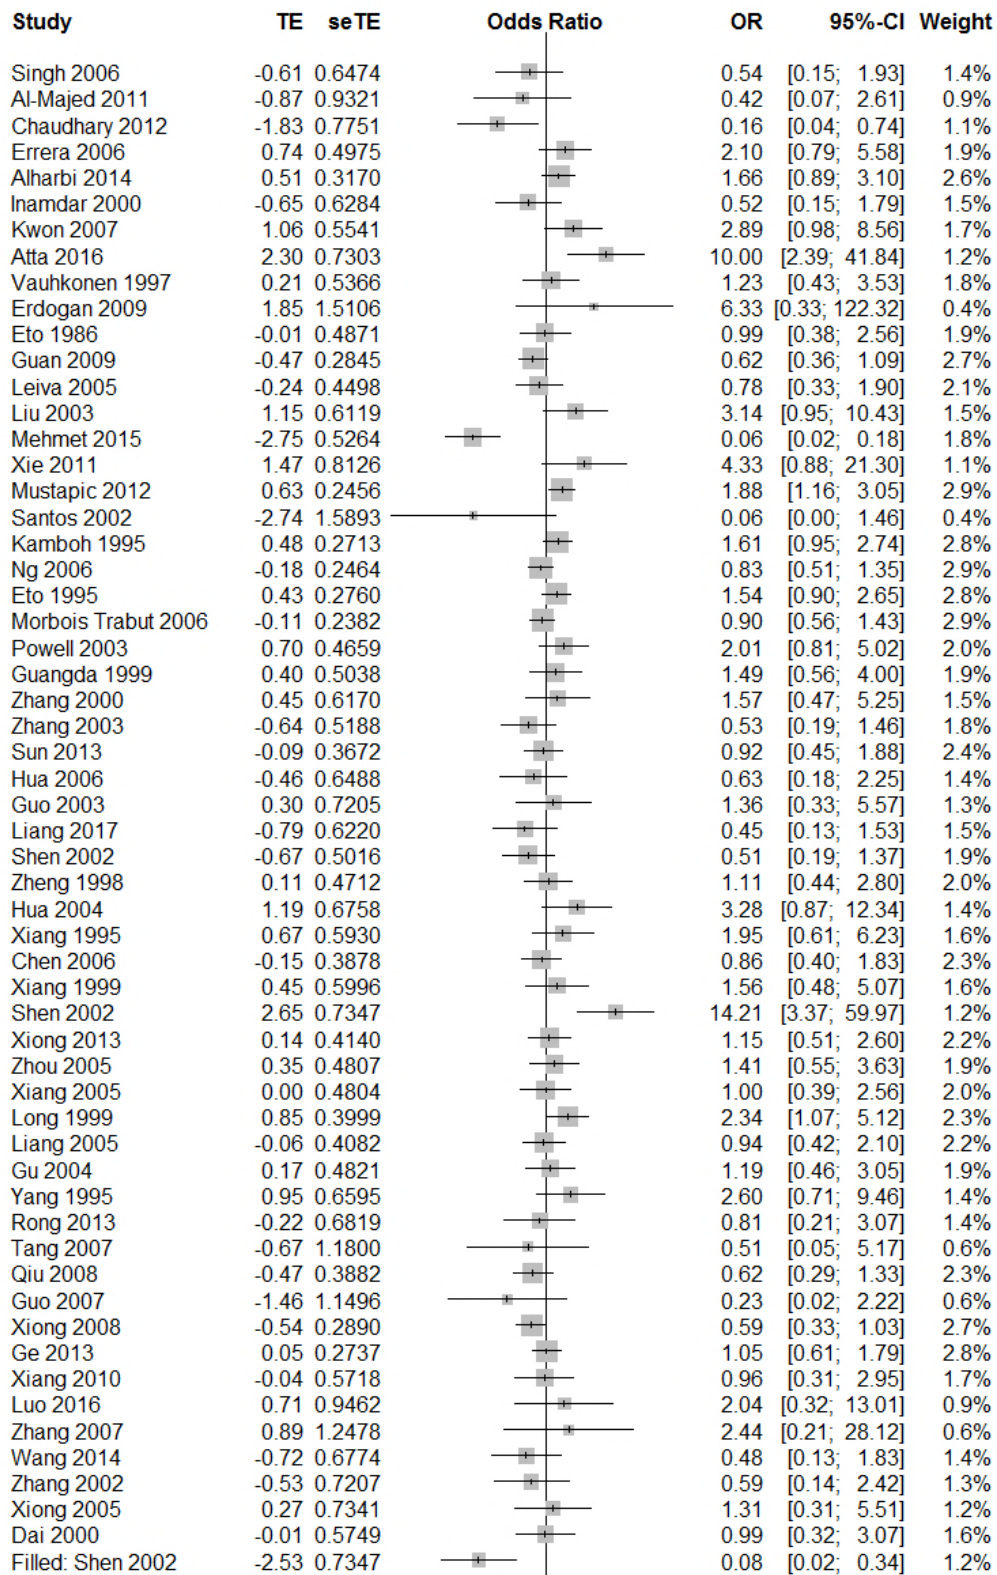

**Random effects model**

Heterogeneity:  $I^2 = 58\%$ ,  $\tau^2 = 0.2979$ ,  $p < 0.01$

0.01 0.1 1 10 100

**1.05 [0.86; 1.28] 100.0%**



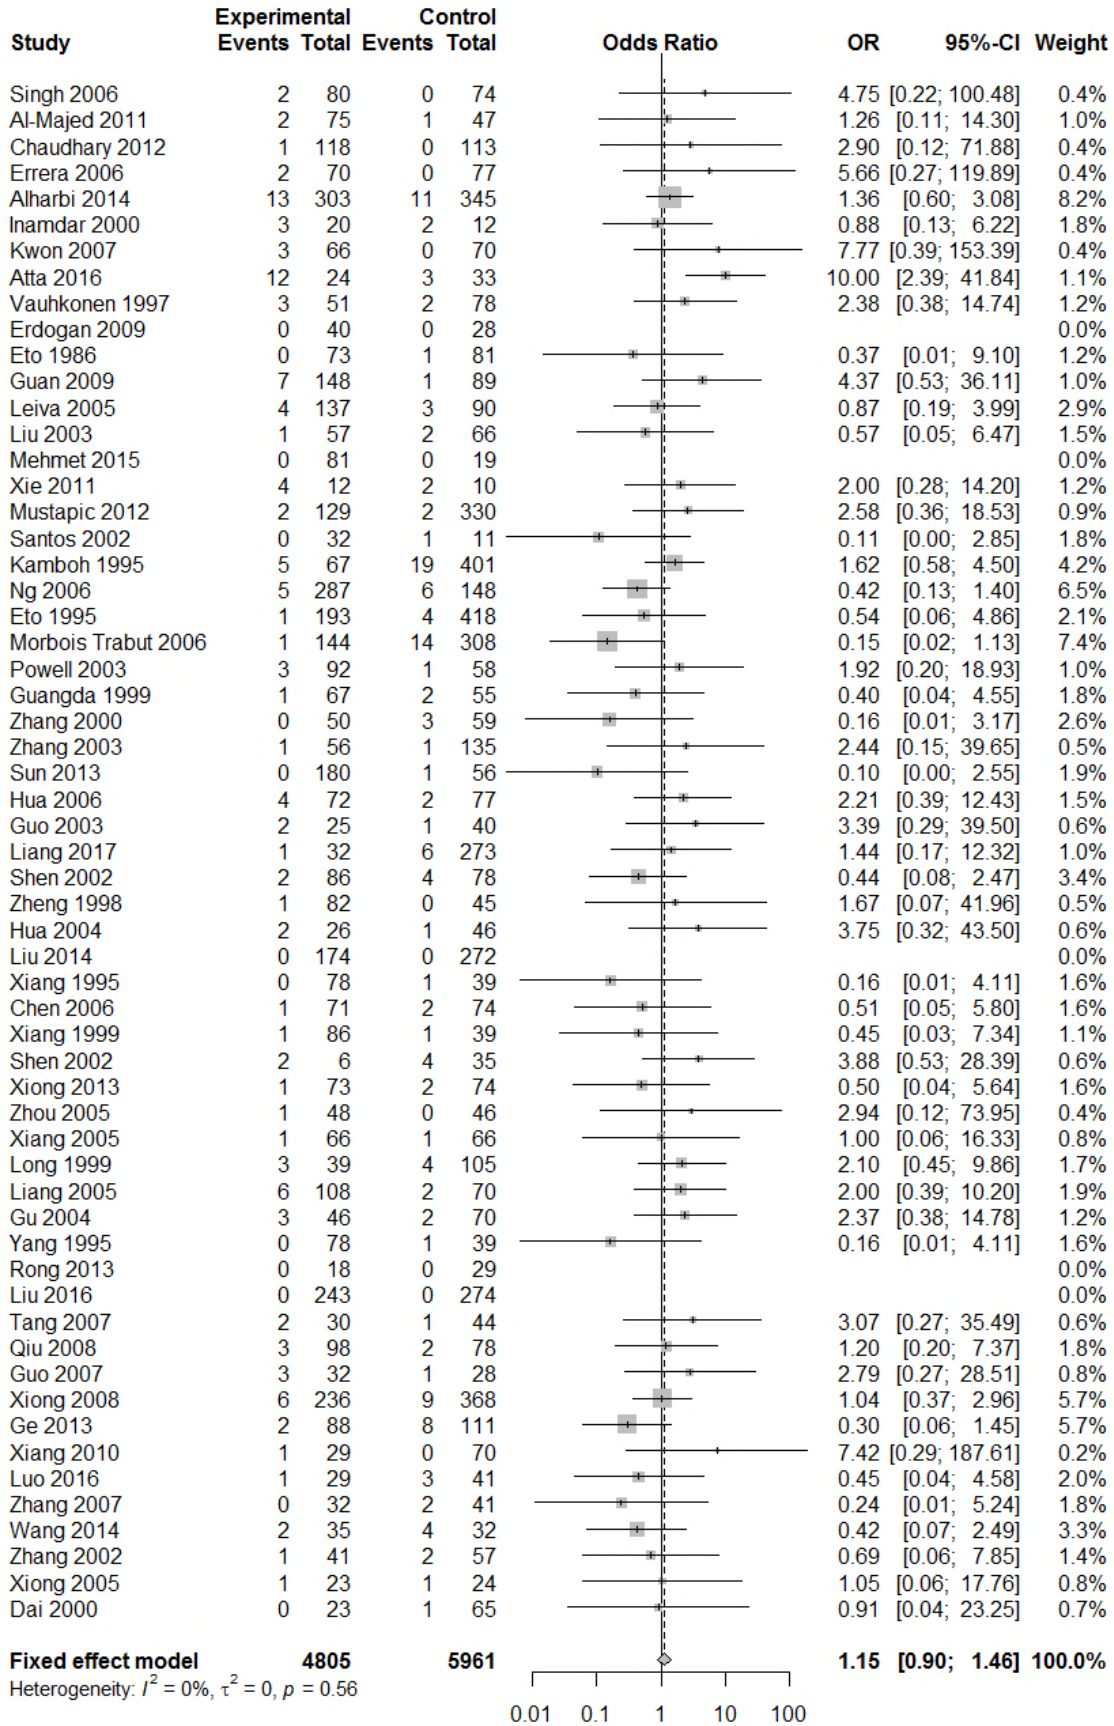

| Study               | Experimental |       | Control |       | Odds Ratio | OR    | 95%-CI        | Weight |
|---------------------|--------------|-------|---------|-------|------------|-------|---------------|--------|
|                     | Events       | Total | Events  | Total |            |       |               |        |
| Singh 2006          | 5            | 83    | 13      | 87    |            | 0.36  | [0.12; 1.07]  | 1.5%   |
| Al-Majed 2011       | 6            | 79    | 9       | 55    |            | 0.42  | [0.14; 1.26]  | 1.2%   |
| Chaudhary 2012      | 30           | 147   | 21      | 134   |            | 1.38  | [0.75; 2.55]  | 2.2%   |
| Errera 2006         | 12           | 80    | 23      | 100   |            | 0.59  | [0.27; 1.28]  | 2.2%   |
| Alharbi 2014        | 35           | 325   | 60      | 394   |            | 0.67  | [0.43; 1.05]  | 6.1%   |
| Inamdar 2000        | 16           | 33    | 8       | 18    |            | 1.18  | [0.37; 3.73]  | 0.7%   |
| Kwon 2007           | 14           | 77    | 12      | 82    |            | 1.30  | [0.56; 3.01]  | 1.2%   |
| Atta 2016           | 9            | 21    | 9       | 39    |            | 2.50  | [0.80; 7.82]  | 0.5%   |
| Vauhkonen 1997      | 20           | 68    | 33      | 109   |            | 0.96  | [0.49; 1.86]  | 2.3%   |
| Erdogan 2009        | 12           | 52    | 7       | 35    |            | 1.20  | [0.42; 3.43]  | 0.8%   |
| Eto 1986            | 21           | 94    | 16      | 96    |            | 1.44  | [0.70; 2.97]  | 1.6%   |
| Guan 2009           | 24           | 165   | 9       | 97    |            | 1.66  | [0.74; 3.75]  | 1.2%   |
| Leiva 2005          | 43           | 176   | 39      | 126   |            | 0.72  | [0.43; 1.20]  | 4.3%   |
| Liu 2003            | 12           | 68    | 11      | 75    |            | 1.25  | [0.51; 3.05]  | 1.1%   |
| Mehmet 2015         | 13           | 94    | 9       | 28    |            | 0.34  | [0.13; 0.91]  | 1.5%   |
| Xie 2011            | 19           | 27    | 5       | 13    |            | 3.80  | [0.95; 15.25] | 0.3%   |
| Mustapic 2012       | 30           | 157   | 76      | 404   |            | 1.02  | [0.64; 1.63]  | 4.4%   |
| Santos 2002         | 3            | 35    | 8       | 18    |            | 0.12  | [0.03; 0.53]  | 1.2%   |
| Kamboh 1995         | 26           | 88    | 150     | 532   |            | 1.07  | [0.65; 1.75]  | 3.8%   |
| Ng 2006             | 39           | 321   | 19      | 161   |            | 1.03  | [0.58; 1.85]  | 2.8%   |
| Eto 1995            | 55           | 247   | 111     | 525   |            | 1.07  | [0.74; 1.54]  | 7.0%   |
| Morbois Trabut 2006 | 33           | 176   | 87      | 381   |            | 0.78  | [0.50; 1.22]  | 5.6%   |
| Powell 2003         | 27           | 116   | 21      | 78    |            | 0.82  | [0.43; 1.59]  | 2.4%   |
| Guangda 1999        | 7            | 73    | 7       | 60    |            | 0.80  | [0.27; 2.43]  | 0.9%   |
| Zhang 2000          | 6            | 56    | 6       | 62    |            | 1.12  | [0.34; 3.70]  | 0.6%   |
| Zhang 2003          | 12           | 67    | 31      | 165   |            | 0.94  | [0.45; 1.97]  | 1.9%   |
| Sun 2013            | 21           | 201   | 6       | 61    |            | 1.07  | [0.41; 2.78]  | 1.0%   |
| Hua 2006            | 20           | 88    | 13      | 88    |            | 1.70  | [0.78; 3.67]  | 1.3%   |
| Guo 2003            | 9            | 32    | 6       | 45    |            | 2.54  | [0.80; 8.07]  | 0.5%   |
| Liang 2017          | 7            | 38    | 38      | 305   |            | 1.59  | [0.65; 3.86]  | 0.9%   |
| Shen 2002           | 11           | 95    | 18      | 92    |            | 0.54  | [0.24; 1.21]  | 2.0%   |
| Zheng 1998          | 11           | 92    | 6       | 51    |            | 1.02  | [0.35; 2.94]  | 0.9%   |
| Hua 2004            | 4            | 28    | 8       | 53    |            | 0.94  | [0.26; 3.43]  | 0.6%   |
| Liu 2014            | 31           | 205   | 23      | 295   |            | 2.11  | [1.19; 3.73]  | 2.0%   |
| Xiang 1995          | 26           | 104   | 6       | 44    |            | 2.11  | [0.80; 5.56]  | 0.8%   |
| Chen 2006           | 8            | 78    | 10      | 82    |            | 0.82  | [0.31; 2.21]  | 1.1%   |
| Xiang 1999          | 24           | 109   | 6       | 44    |            | 1.79  | [0.68; 4.73]  | 0.8%   |
| Shen 2002           | 14           | 18    | 9       | 40    |            | 12.06 | [3.17; 45.87] | 0.2%   |
| Xiong 2013          | 31           | 103   | 22      | 94    |            | 1.41  | [0.75; 2.66]  | 2.0%   |
| Zhou 2005           | 6            | 53    | 11      | 57    |            | 0.53  | [0.18; 1.56]  | 1.2%   |
| Xiang 2005          | 20           | 85    | 15      | 80    |            | 1.33  | [0.63; 2.83]  | 1.5%   |
| Long 1999           | 12           | 48    | 12      | 113   |            | 2.81  | [1.16; 6.80]  | 0.7%   |
| Liang 2005          | 18           | 120   | 8       | 76    |            | 1.50  | [0.62; 3.64]  | 1.1%   |
| Gu 2004             | 7            | 50    | 8       | 76    |            | 1.38  | [0.47; 4.09]  | 0.7%   |
| Yang 1995           | 26           | 104   | 5       | 43    |            | 2.53  | [0.90; 7.11]  | 0.7%   |
| Rong 2013           | 2            | 20    | 1       | 30    |            | 3.22  | [0.27; 38.15] | 0.1%   |
| Liu 2016            | 43           | 286   | 23      | 297   |            | 2.11  | [1.23; 3.60]  | 2.4%   |
| Tang 2007           | 10           | 38    | 13      | 56    |            | 1.18  | [0.46; 3.06]  | 1.0%   |
| Qiu 2008            | 14           | 109   | 11      | 87    |            | 1.02  | [0.44; 2.37]  | 1.3%   |
| Guo 2007            | 7            | 36    | 7       | 34    |            | 0.93  | [0.29; 3.00]  | 0.7%   |
| Xiong 2008          | 47           | 277   | 87      | 446   |            | 0.84  | [0.57; 1.25]  | 7.0%   |
| Ge 2013             | 73           | 159   | 47      | 150   |            | 1.86  | [1.17; 2.96]  | 3.3%   |
| Xiang 2010          | 7            | 35    | 19      | 89    |            | 0.92  | [0.35; 2.43]  | 1.1%   |
| Luo 2016            | 2            | 30    | 7       | 45    |            | 0.39  | [0.07; 2.01]  | 0.7%   |
| Zhang 2007          | 3            | 35    | 7       | 46    |            | 0.52  | [0.12; 2.18]  | 0.7%   |
| Wang 2014           | 13           | 46    | 8       | 36    |            | 1.38  | [0.50; 3.80]  | 0.8%   |
| Zhang 2002          | 11           | 51    | 11      | 66    |            | 1.38  | [0.54; 3.48]  | 1.0%   |
| Xiong 2005          | 2            | 24    | 2       | 25    |            | 1.05  | [0.14; 8.08]  | 0.2%   |
| Dai 2000            | 3            | 26    | 9       | 73    |            | 0.93  | [0.23; 3.73]  | 0.5%   |

**Fixed effect model**      **5748**      **7093**  
Heterogeneity:  $I^2 = 39\%$ ,  $\tau^2 = 0.0970$ ,  $p < 0.01$

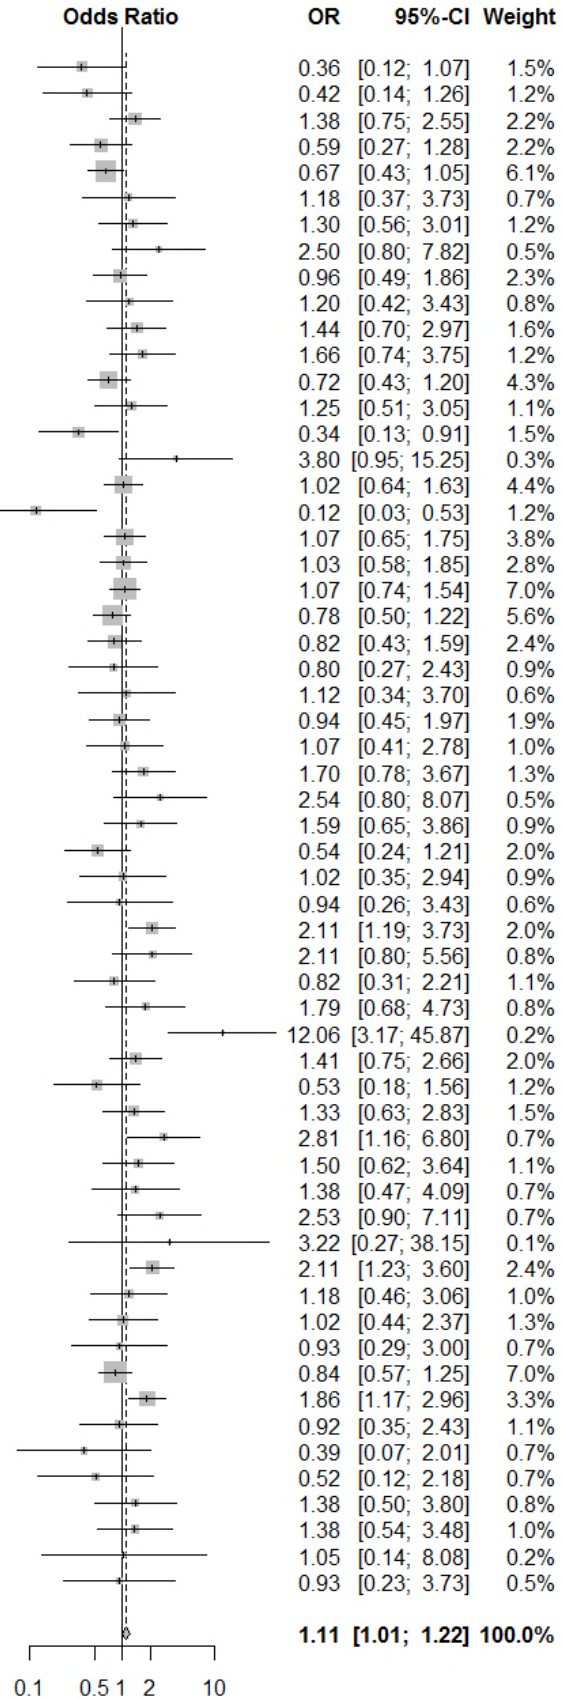

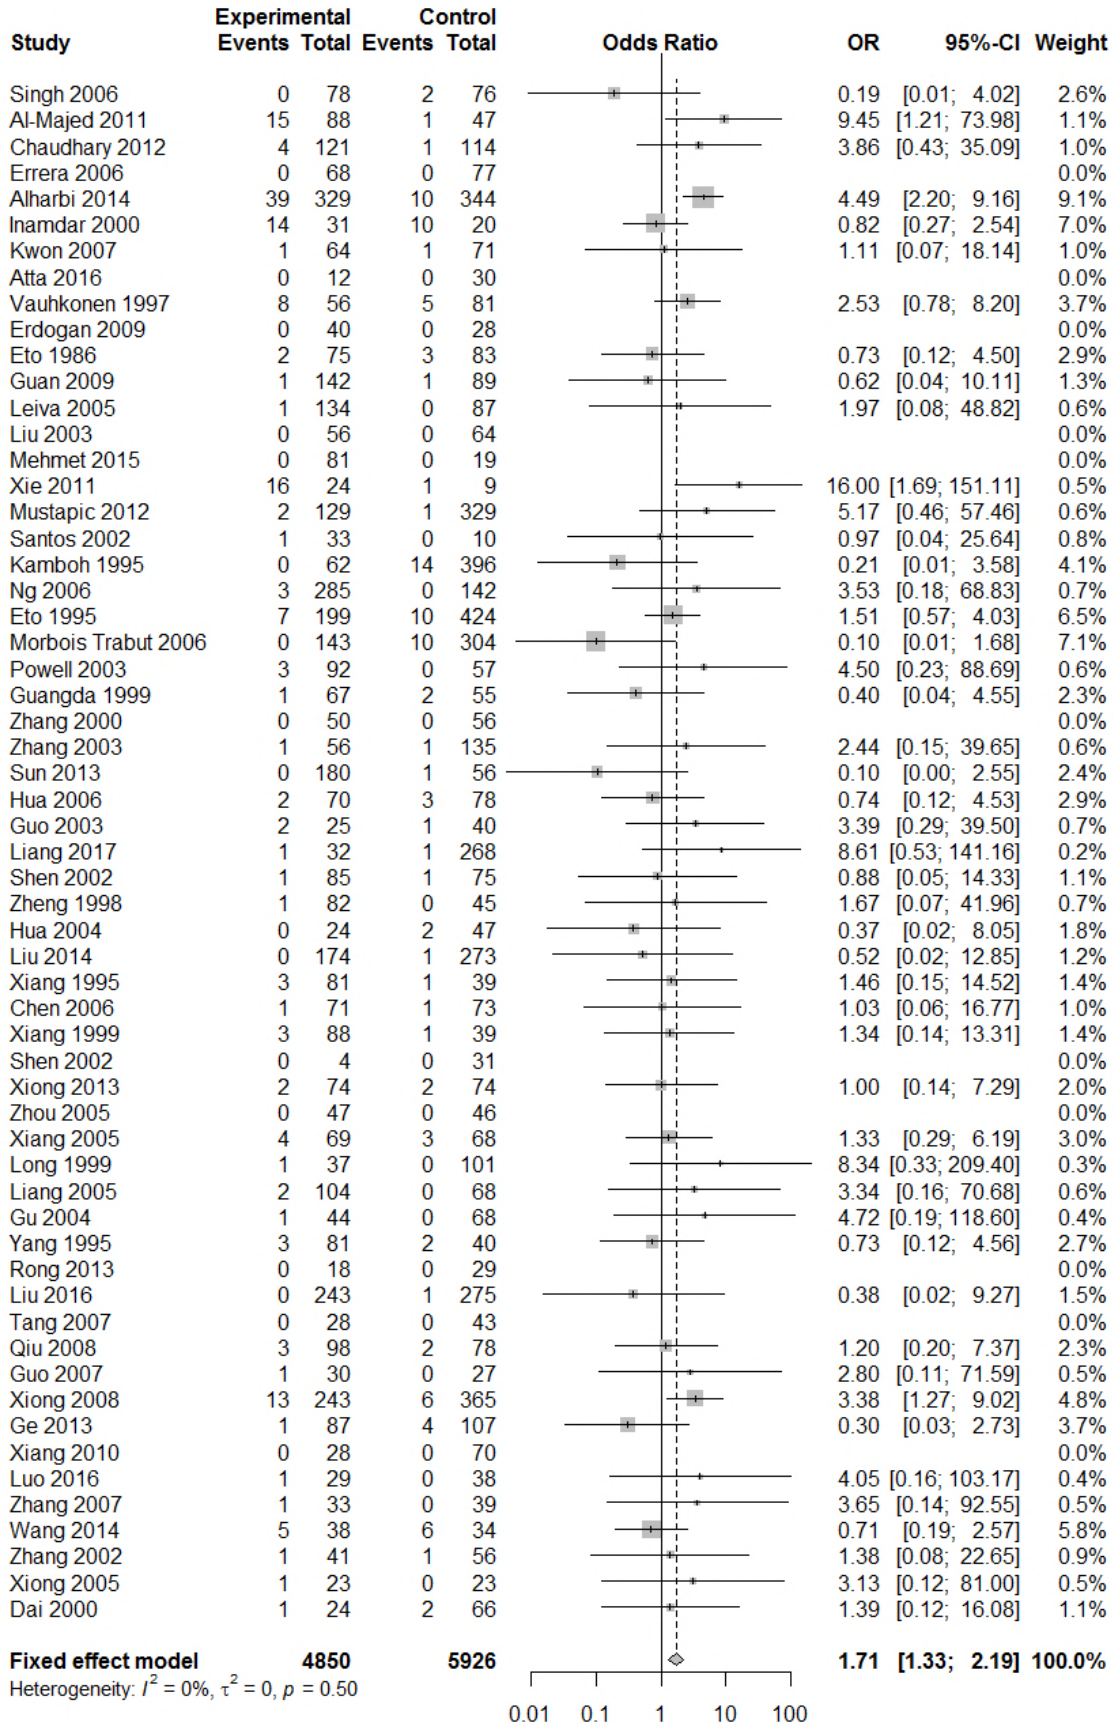

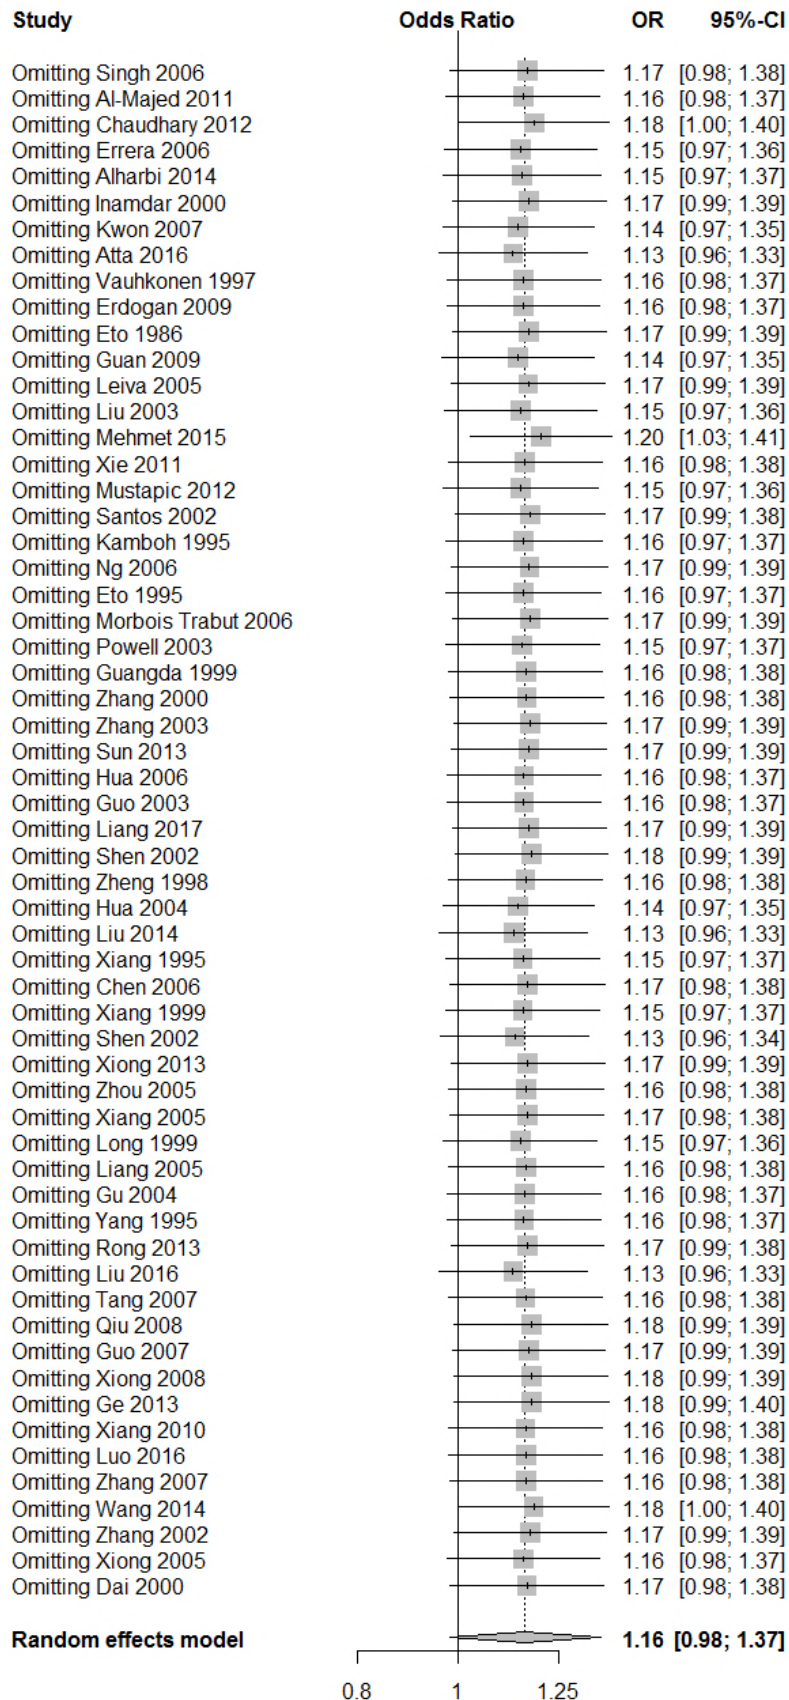

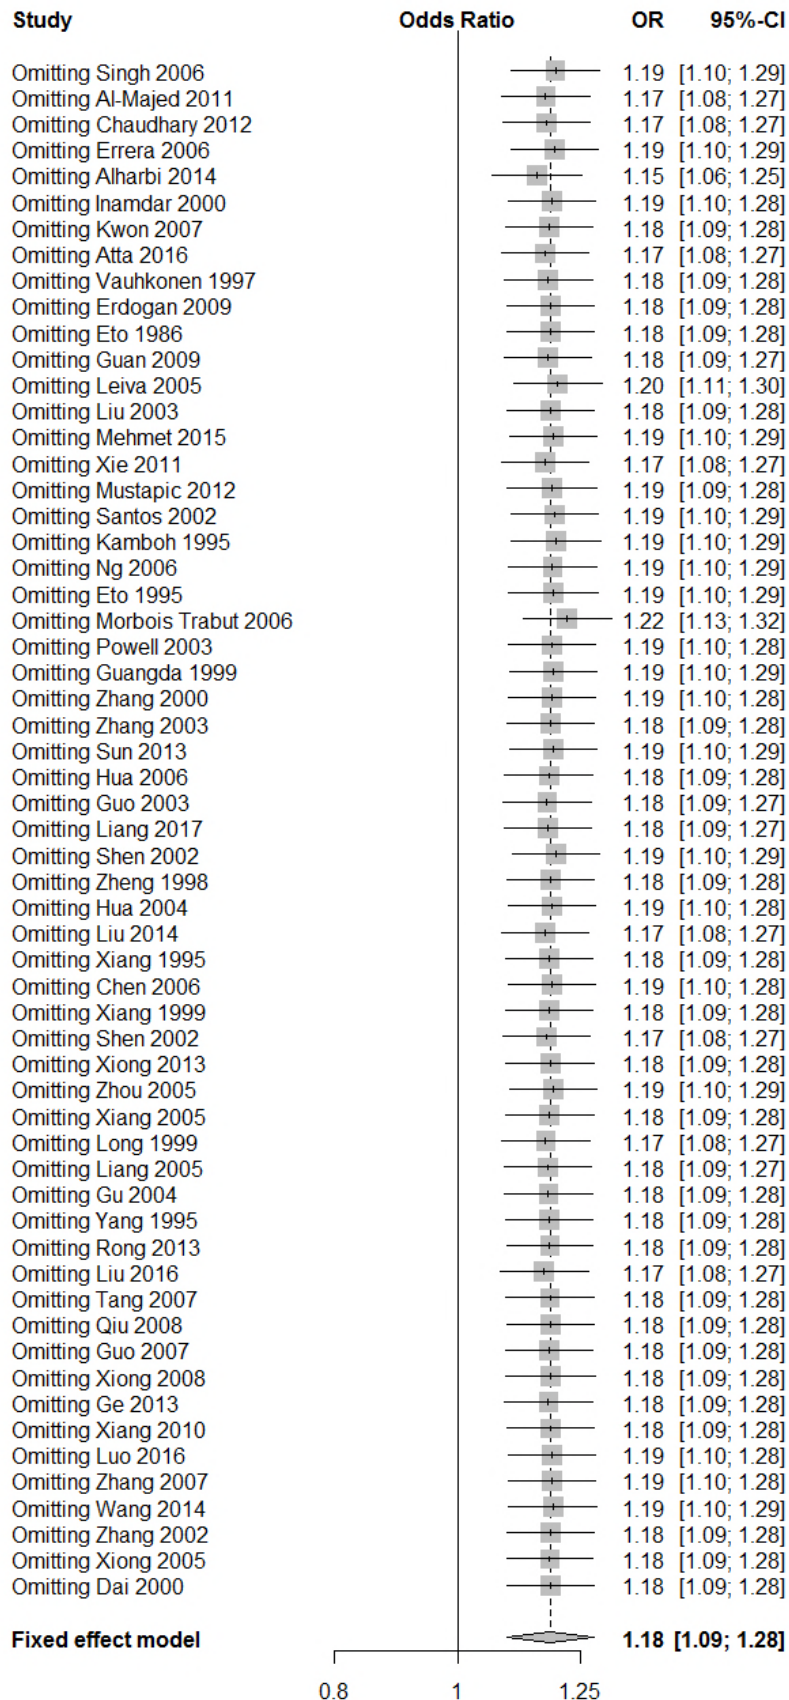

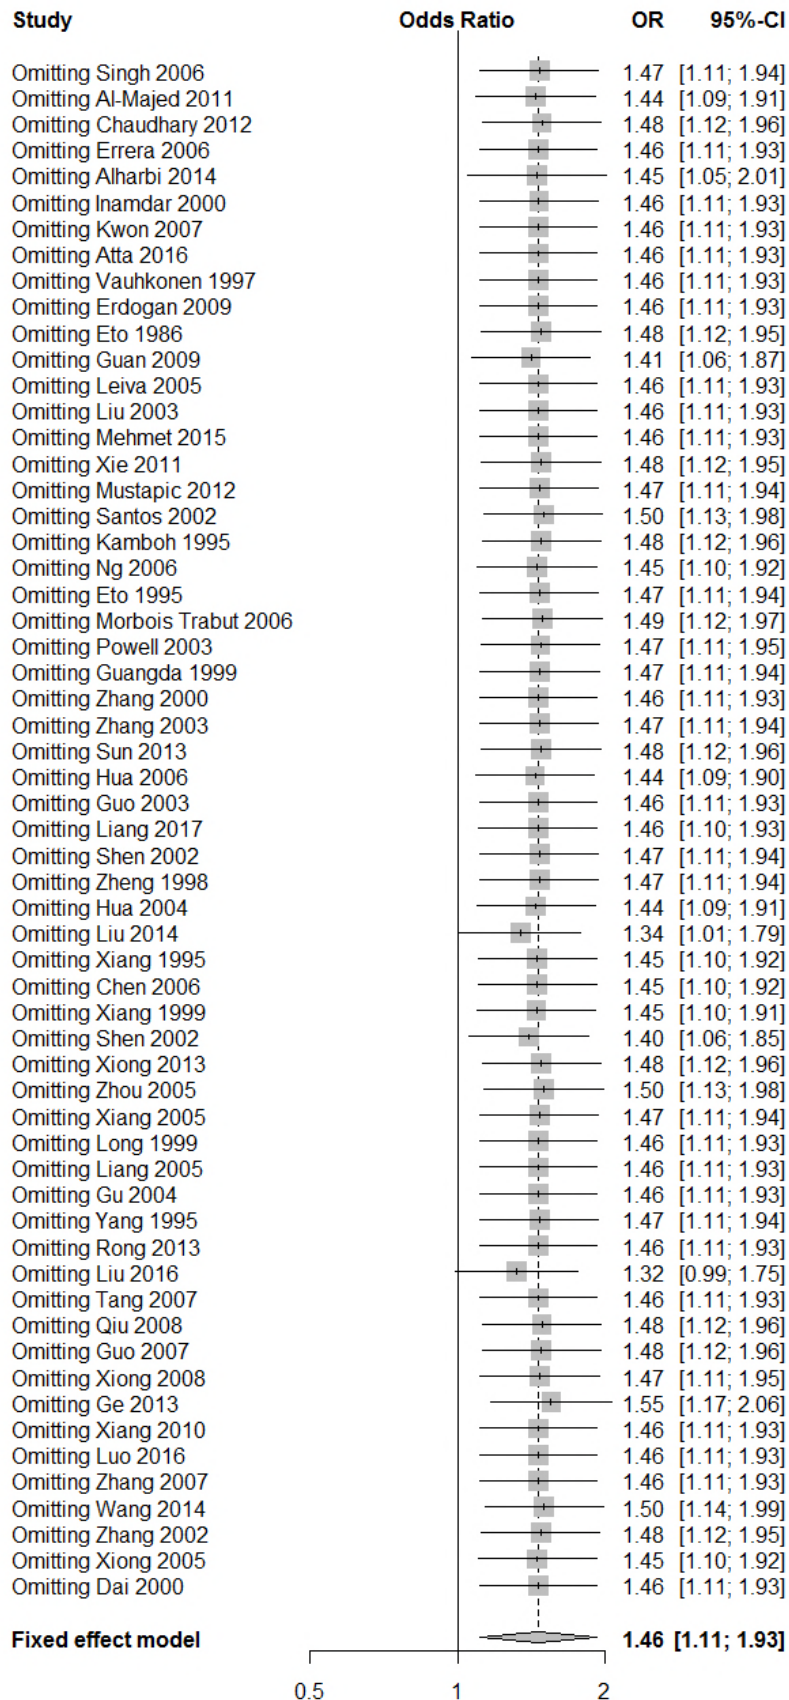

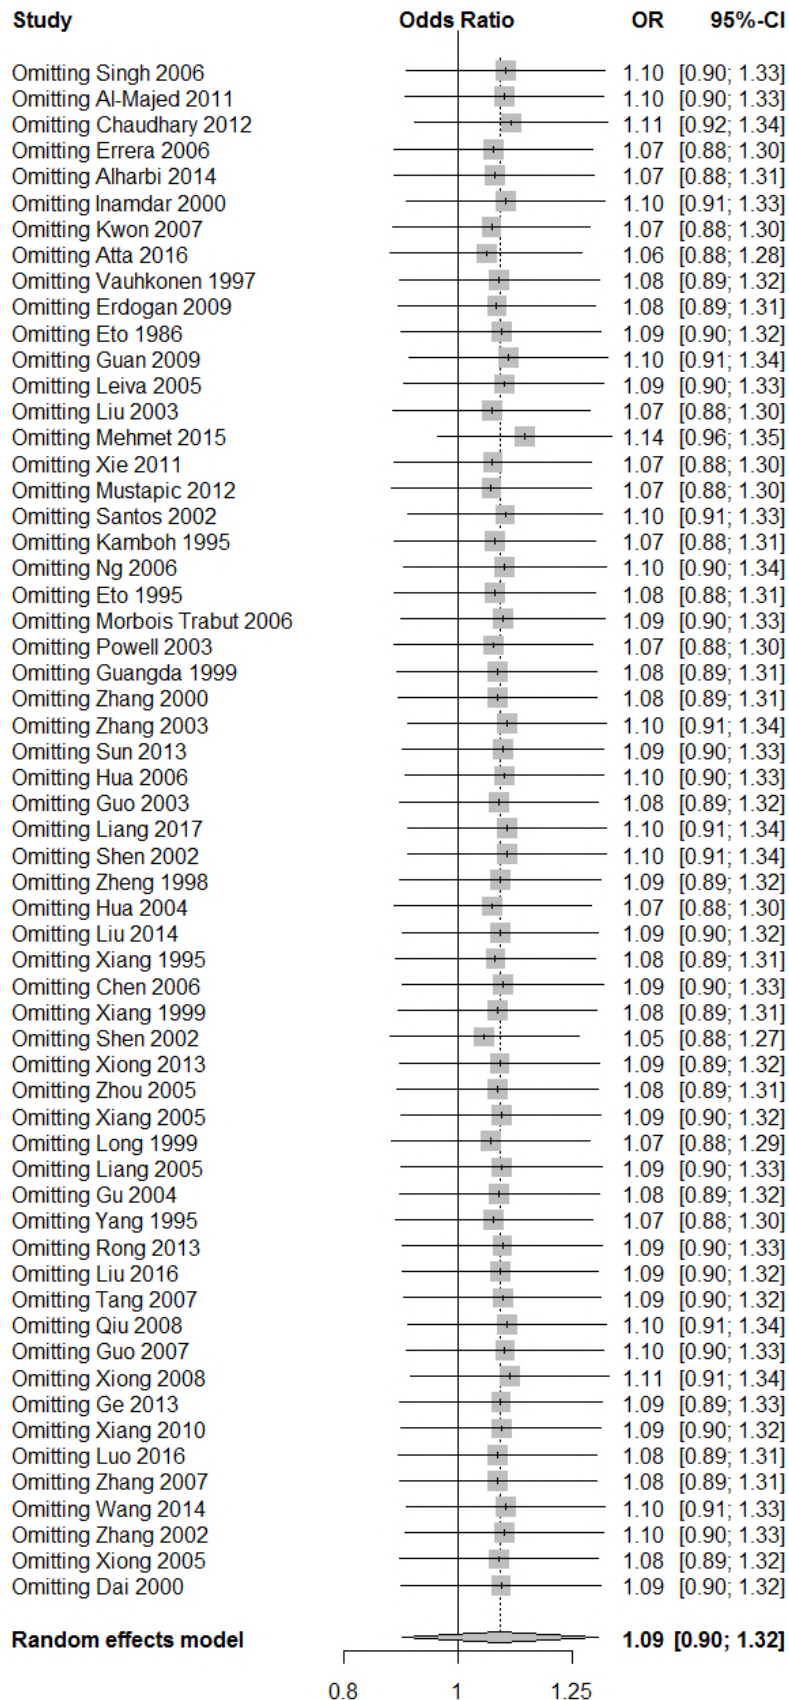

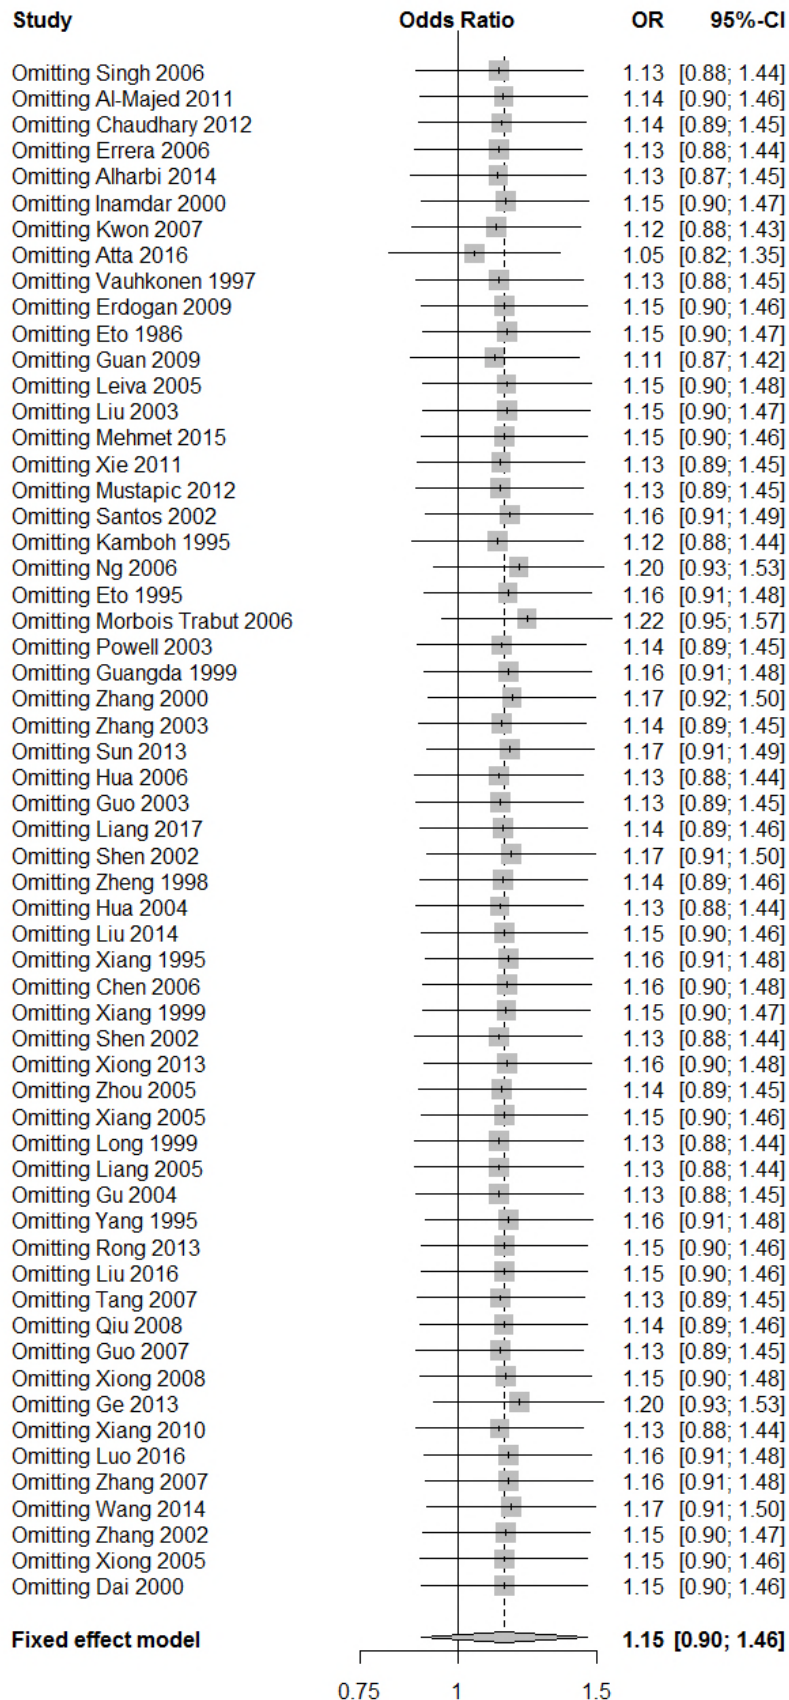



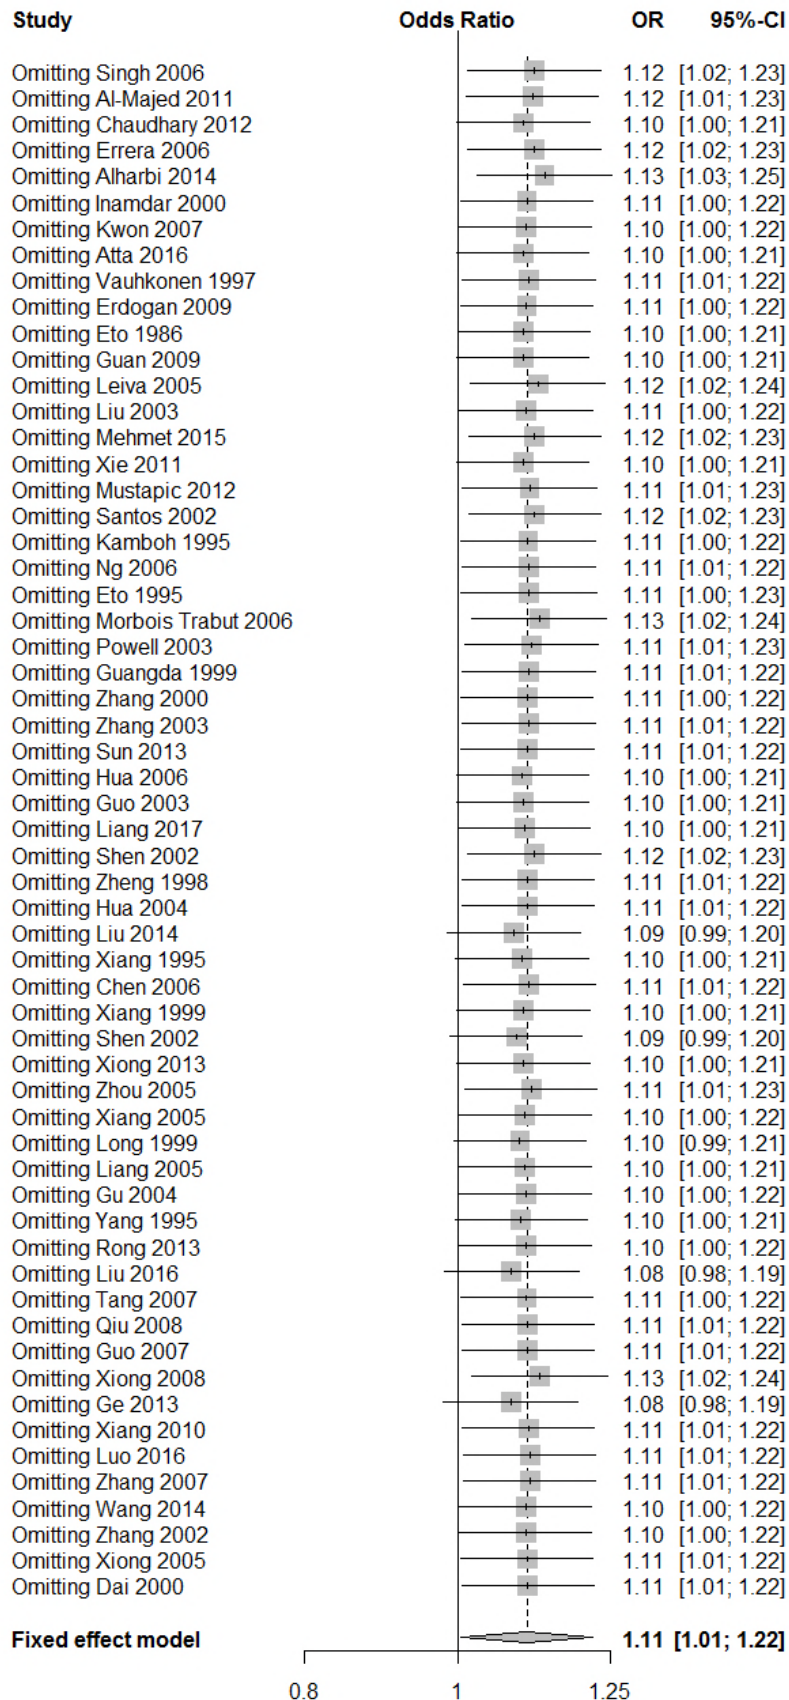

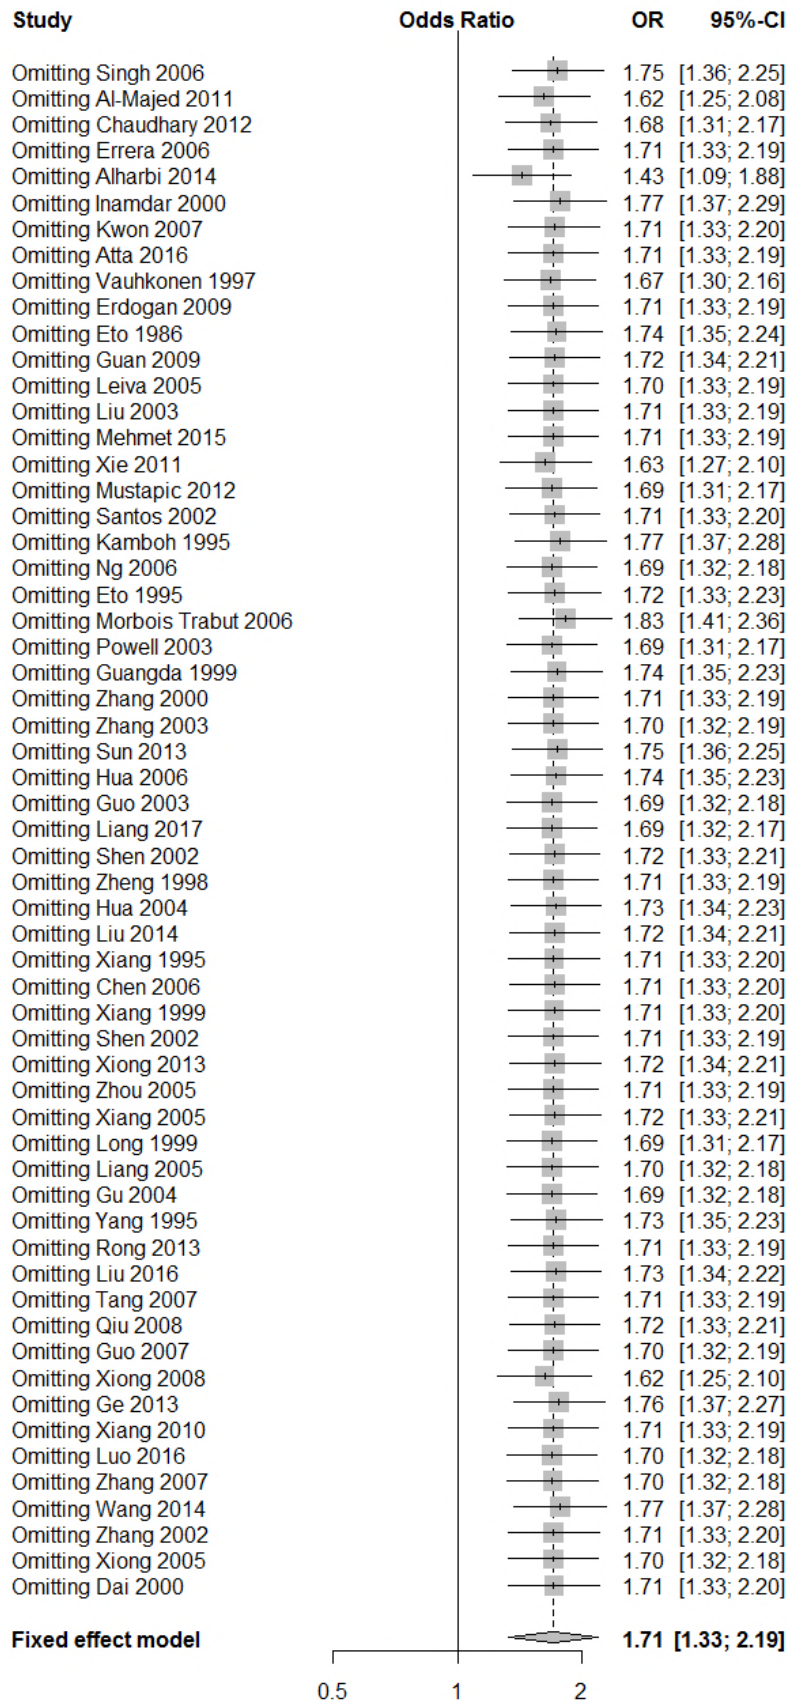

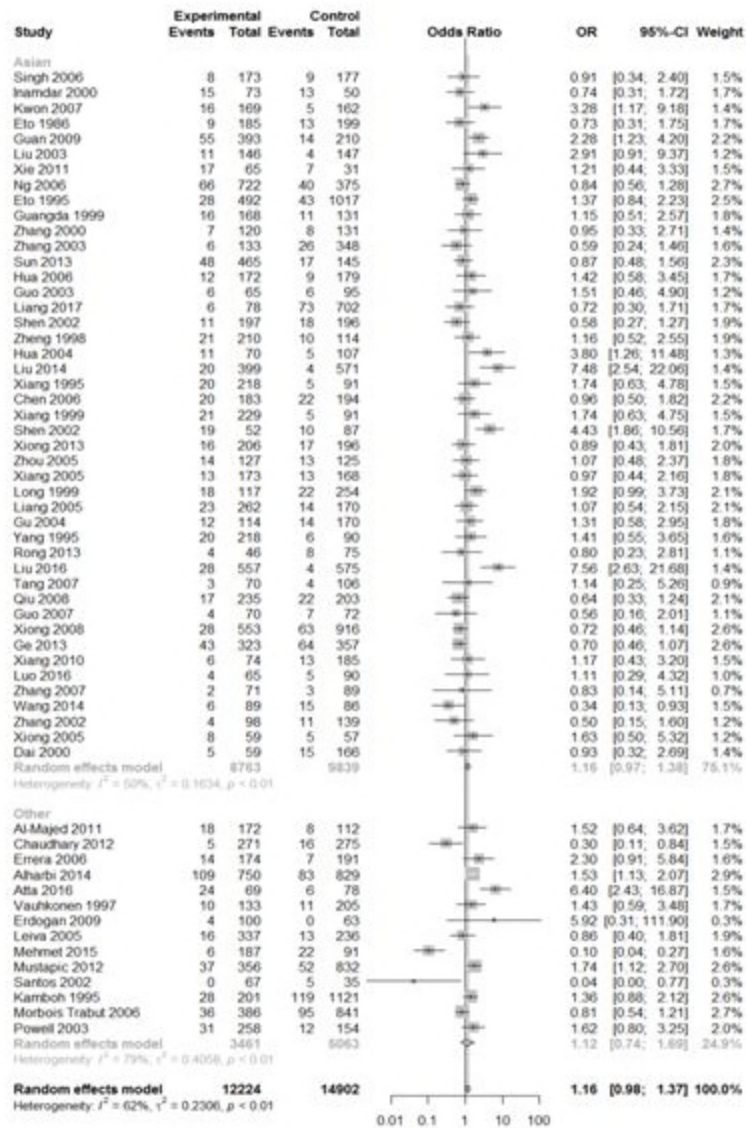

**A**

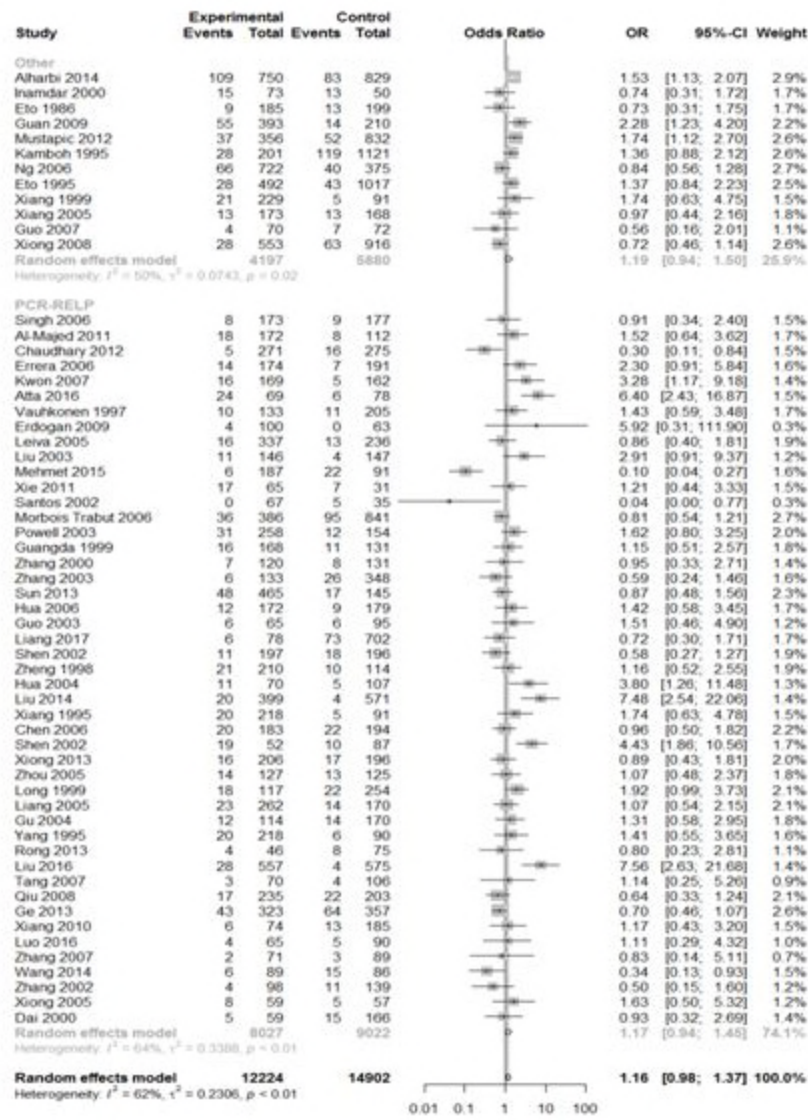

**B**

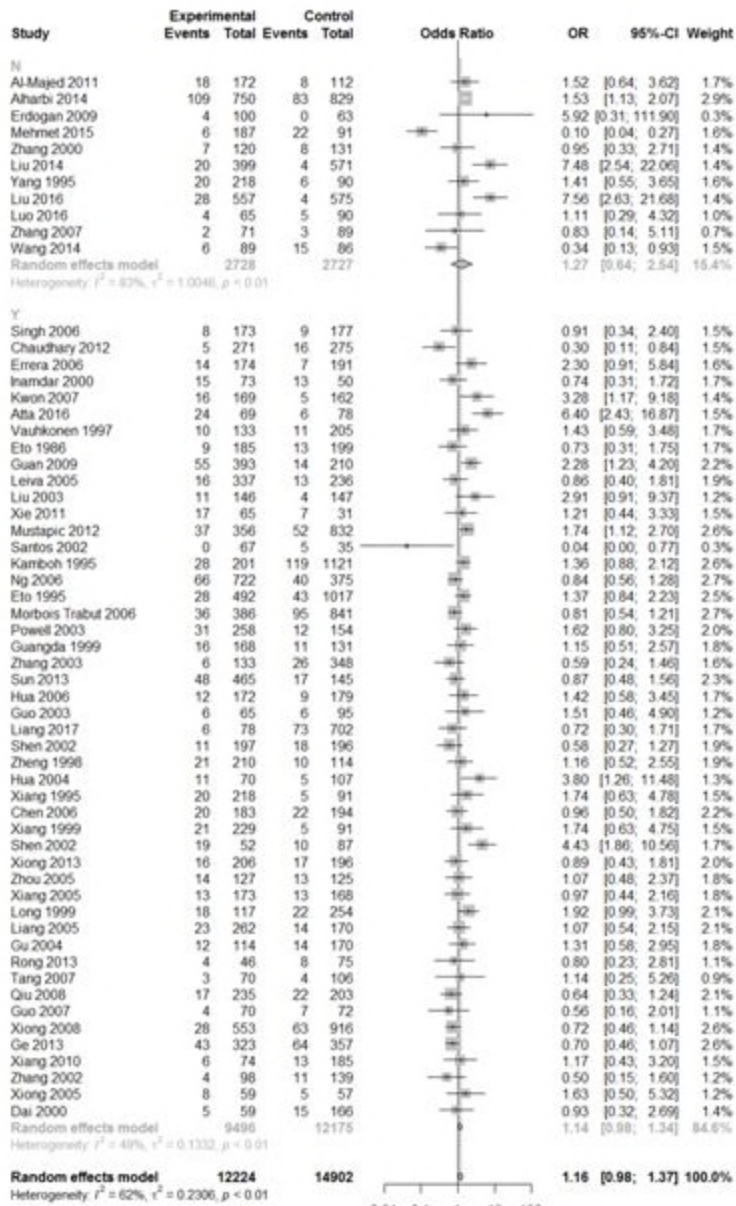

**A**

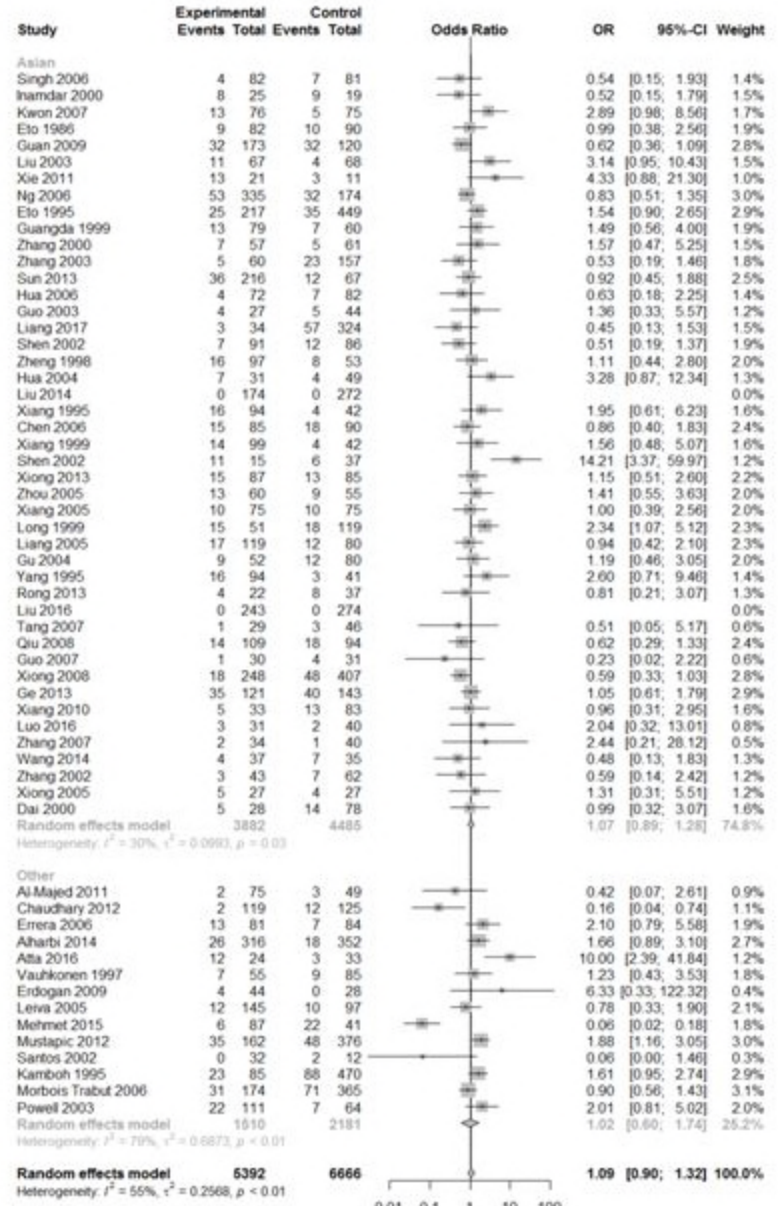

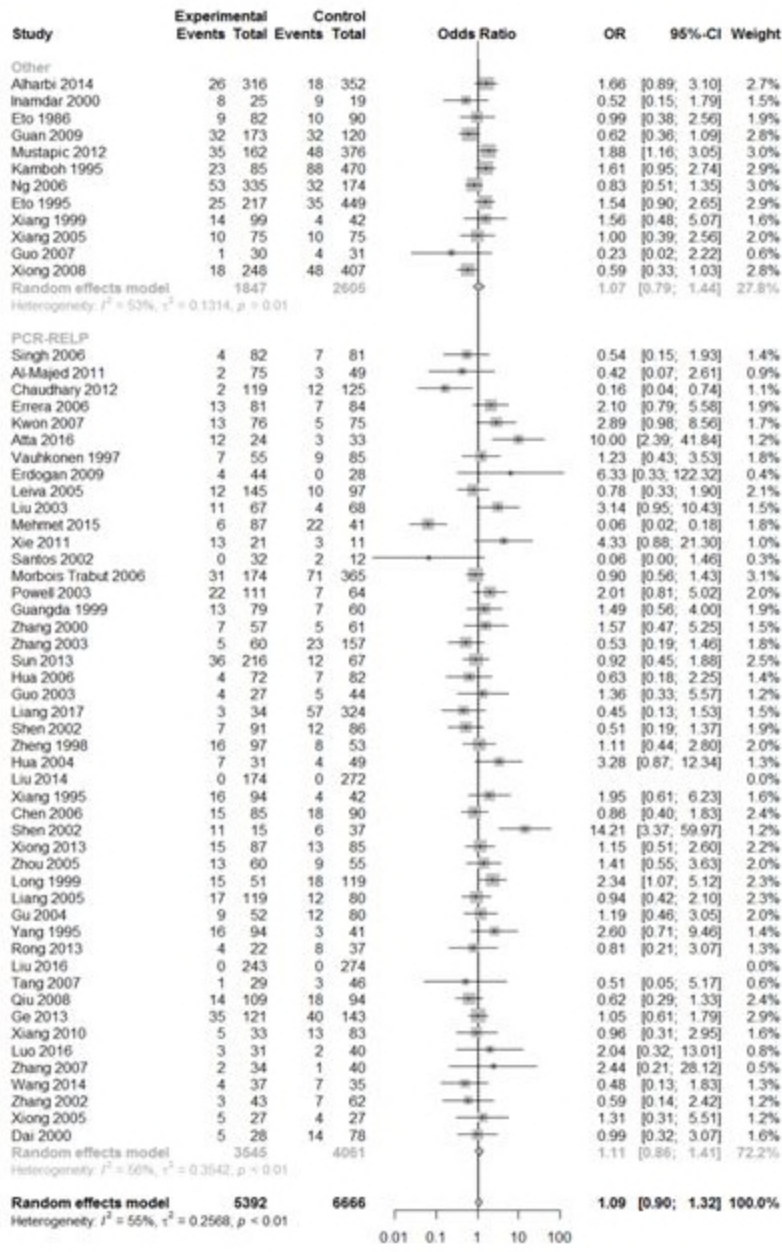

**A**

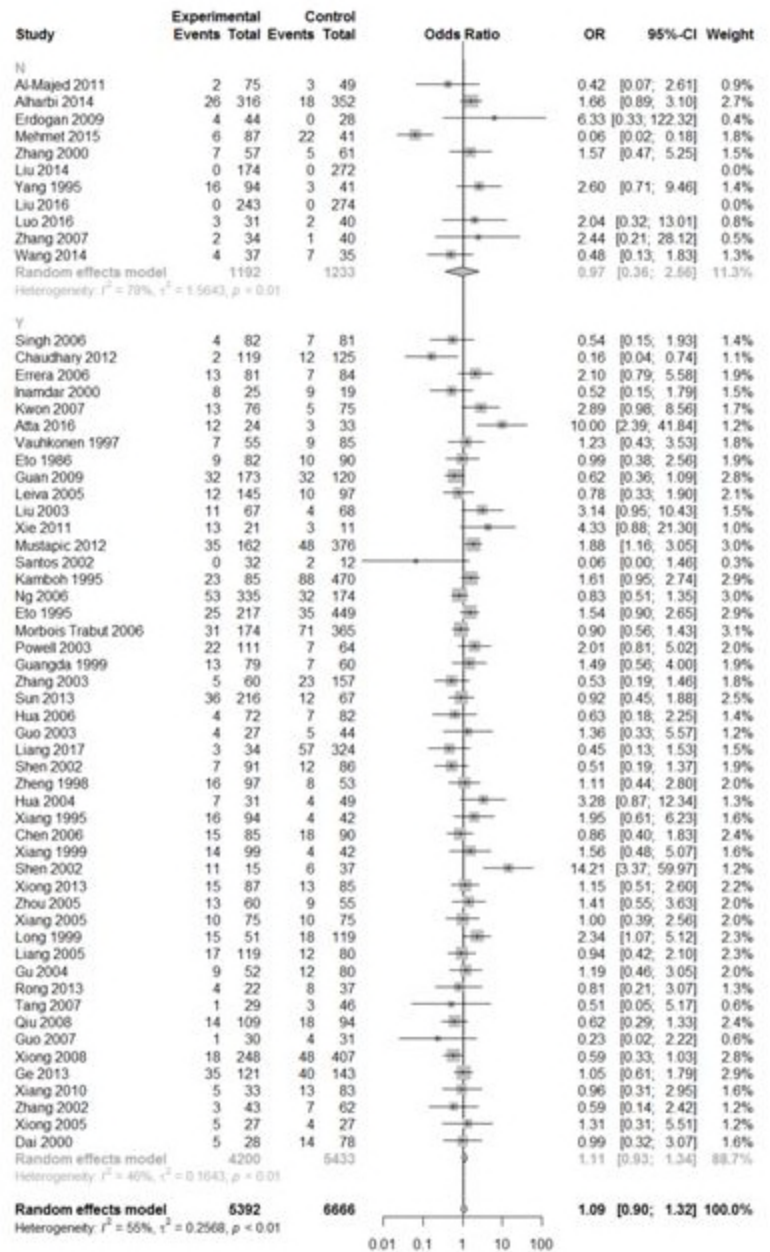

**Funnel plot**

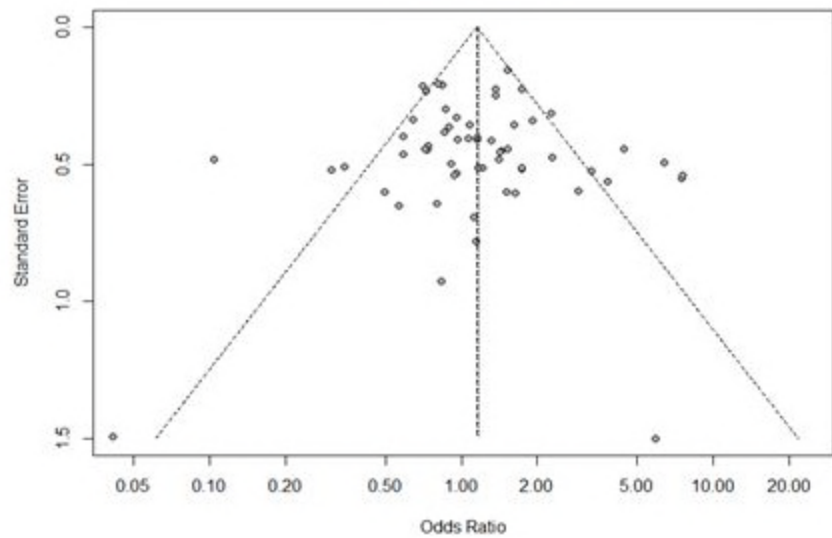

**A**

**Funnel plot**

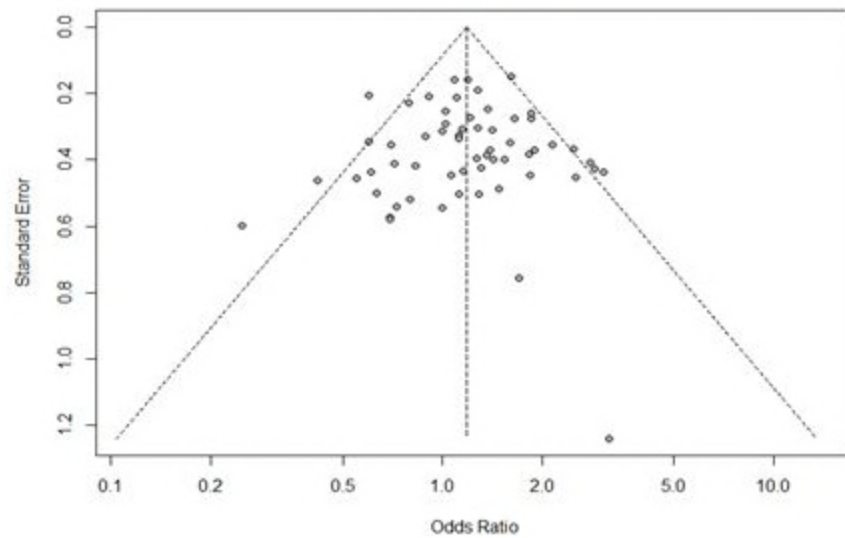

**B**

**Funnel plot**

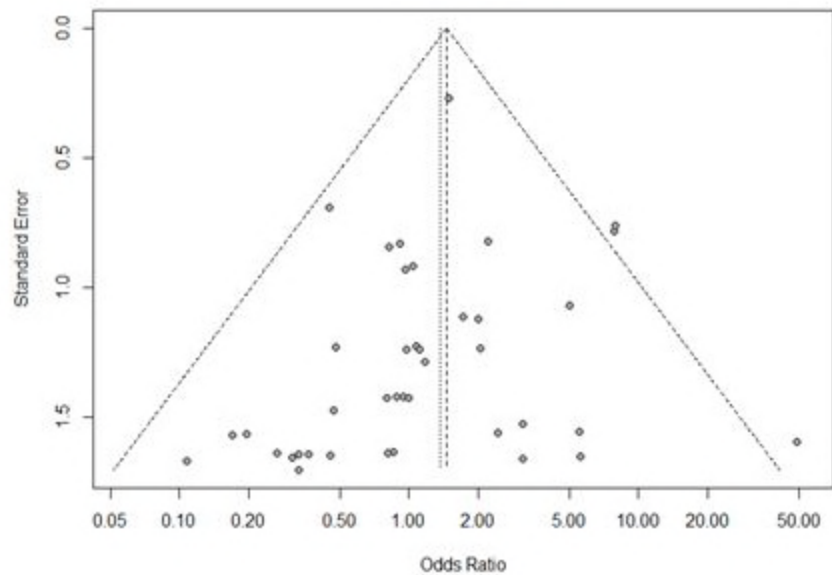

**C**

**Funnel plot**

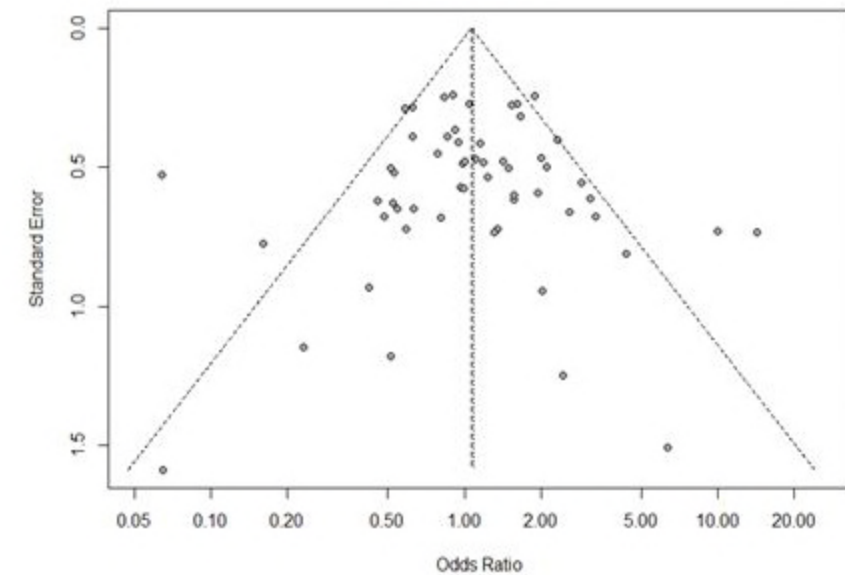

**D**

Funnel plot

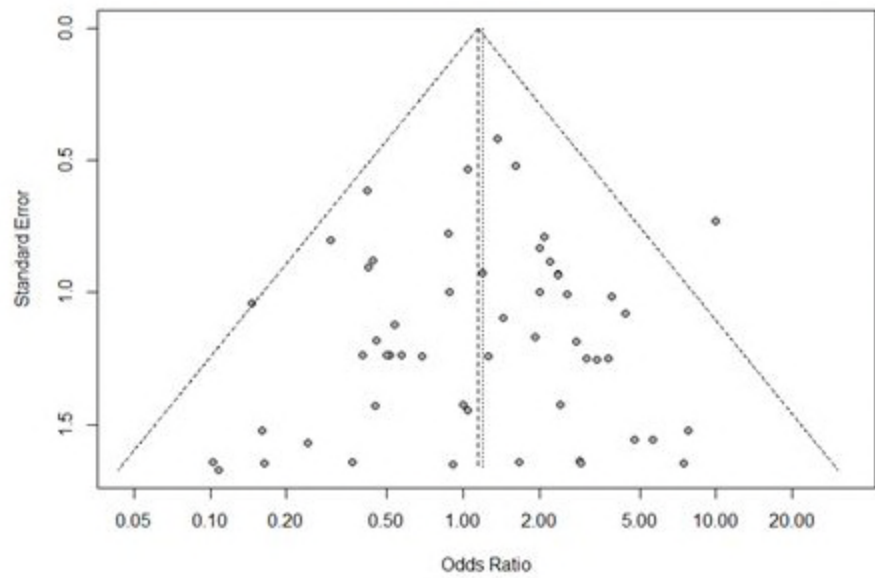

**A**

Funnel plot

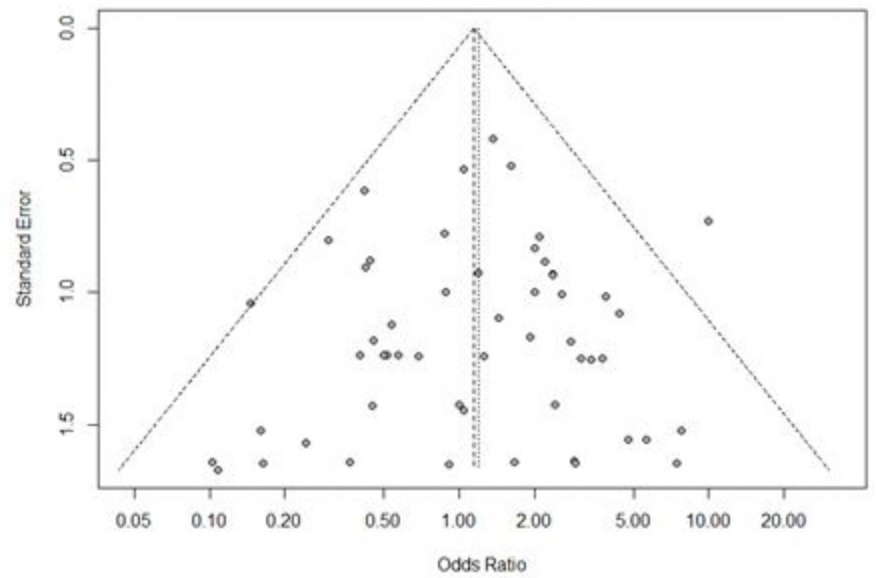

**B**

Funnel plot

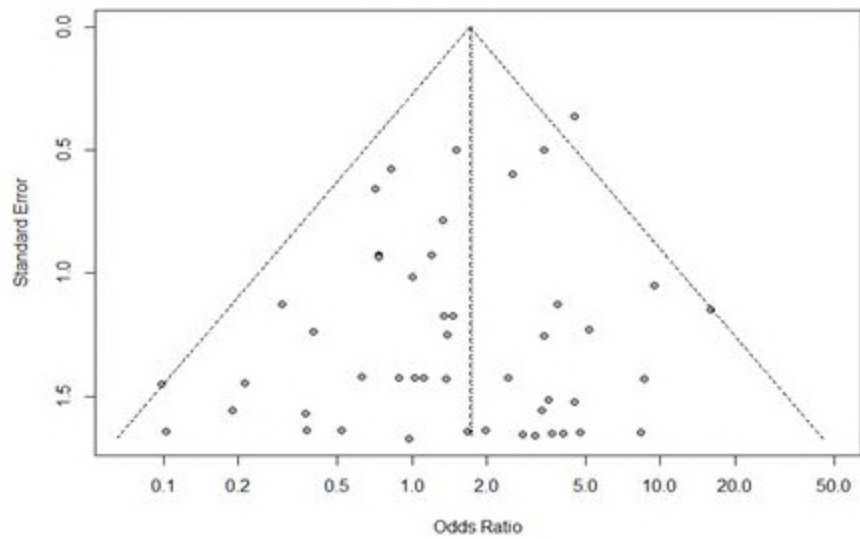

**C**

## Figure legends:

Supplementary Figure S1 (A) Forest plot for associations between type 2 diabetes and *ApoE*  $\epsilon 2$  allele vs.  $\epsilon 3$  allele in the subgroup based on ethnicity. (B) Forest plot for associations between type 2 diabetes and *ApoE*  $\epsilon 2$  allele vs.  $\epsilon 3$  allele in the subgroup based on genotype.

Supplementary Figure S2 (A) Forest plot for associations between type 2 diabetes and *ApoE*  $\epsilon 2$  allele vs.  $\epsilon 3$  allele in the subgroup based on HWE. (B) Forest plot for associations between type 2 diabetes and *ApoE*  $\epsilon 2/\epsilon 3$  genotype vs.  $\epsilon 3/\epsilon 3$  genotype in the subgroup based on ethnicity.

Supplementary Figure S3 (A) Forest plot for associations between type 2 diabetes and *ApoE*  $\epsilon 2/\epsilon 3$  genotype vs.  $\epsilon 3/\epsilon 3$  genotype in the subgroup based on genotype. (B) Forest plot for associations between type 2 diabetes and *ApoE*  $\epsilon 2/\epsilon 3$  genotype vs.  $\epsilon 3/\epsilon 3$  genotype in the subgroup based on HWE.

Supplementary Figure S4 (A) Funnel plot of association between type 2 diabetes and *ApoE*  $\epsilon 2$  allele vs.  $\epsilon 3$  allele. (B) Funnel plot of association between type 2 diabetes and *ApoE*  $\epsilon 4$  allele vs.  $\epsilon 3$  allele. (C) Funnel plot of association between type 2 diabetes and *ApoE*  $\epsilon 2/\epsilon 2$  genotype vs. and  $\epsilon 3/\epsilon 3$  genotype. (D) Funnel plot of association between type 2 diabetes and *ApoE*  $\epsilon 2/\epsilon 3$  genotype vs. and  $\epsilon 3/\epsilon 3$  genotype.

Supplementary Figure S5 (A) Funnel plot of association between type 2 diabetes and *ApoE*  $\epsilon 2/\epsilon 4$  genotype vs. and  $\epsilon 3/\epsilon 3$  genotype. (B) Funnel plot of association between type 2 diabetes and *ApoE*  $\epsilon 3/\epsilon 4$  genotype vs. and  $\epsilon 3/\epsilon 3$  genotype. (C) Funnel plot of association between type 2 diabetes and *ApoE*  $\epsilon 4/\epsilon 4$  genotype vs. and  $\epsilon 3/\epsilon 3$  genotype.



## Figure legends:

Figure 1 Flow chart of the process for literature identification and selection.

Figure 2 Forest plot for the result of association between type 2 diabetes and *ApoE*  $\epsilon 2$  allele vs.  $\epsilon 3$  allele based on a random-effects model.

Figure 3 Forest plot for the result of association between type 2 diabetes and *ApoE*  $\epsilon 4$  allele vs.  $\epsilon 3$  allele based on a fixed-effects model.

Figure 4 Forest plot for the result of association between type 2 diabetes and *ApoE*  $\epsilon 2/\epsilon 2$  genotype vs.  $\epsilon 3/\epsilon 3$  genotype based on a fixed-effects model.

Figure 5 Forest plot for the result of association between type 2 diabetes and *ApoE*  $\epsilon 2/\epsilon 3$  genotype vs.  $\epsilon 3/\epsilon 3$  genotype based on a random-effects model.

Figure 6 Forest plot for the result of association between type 2 diabetes and *ApoE*  $\epsilon 2/\epsilon 4$  genotype vs.  $\epsilon 3/\epsilon 3$  genotype based on a fixed-effects model.

Figure 7 Forest plot for the result of association between type 2 diabetes and *ApoE*  $\epsilon 3/\epsilon 4$  genotype vs.  $\epsilon 3/\epsilon 3$  genotype based on a fixed-effects model.

Figure 8 Forest plot for the result of association between type 2 diabetes and *ApoE*  $\epsilon 4/\epsilon 4$  genotype vs.  $\epsilon 3/\epsilon 3$  genotype based on a fixed-effects model.

Figure 9 Sensitivity analysis for the result of association between type 2 diabetes and *ApoE*  $\epsilon 2$  allele vs.  $\epsilon 3$  allele.

Figure 10 Sensitivity analysis for the result of association between type 2 diabetes and *ApoE*  $\epsilon 4$  allele vs.  $\epsilon 3$  allele.

Figure 11 Sensitivity analysis for the result of association between type 2 diabetes and *ApoE*  $\epsilon 2/\epsilon 2$  genotype vs.  $\epsilon 3/\epsilon 3$  genotype.

Figure 12 Sensitivity analysis for the result of association between type 2 diabetes and *ApoE*  $\epsilon 2/\epsilon 3$  genotype vs.  $\epsilon 3/\epsilon 3$  genotype.

Figure 13 Sensitivity analysis for the result of association between type 2 diabetes and *ApoE*  $\epsilon 2/\epsilon 4$  genotype vs.  $\epsilon 3/\epsilon 3$  genotype.

Figure 14 Sensitivity analysis for the result of association between type 2 diabetes and *ApoE*  $\epsilon 3/\epsilon 4$  genotype vs.  $\epsilon 3/\epsilon 3$  genotype.

Figure 15 Sensitivity analysis for the result of association between type 2 diabetes and *ApoE*  $\epsilon 4/\epsilon 4$  genotype vs.  $\epsilon 3/\epsilon 3$  genotype.
